# Supplementary material for: Oxidative addition of diaryldichalcogenides to the diferrocenylphosphenium ion: synthesis, structure and organocatalytic activity
Source: Royal Society of Chemistry journal article supplement (doi:10.1039/d5cc01555c), 2025-01-01
Supplement: d5cc01555c1.pdf [file d5cc01555c1.pdf]

## Supporting Information

### **Oxidative Addition of Diaryldichalcogenides to the Diferrocenylphosphenium Ion: Synthesis, Structure and Organocatalytic Activity**

Corina Stoian,<sup>a†</sup> Nils Schmidt,<sup>a†</sup> Thomas J. Kuczmera,<sup>b</sup> Pim Puylaert,<sup>a</sup> Enno Lork,<sup>a</sup>

Boris J. Nachtsheim,<sup>\*b</sup> Emanuel Hupf,<sup>\*a</sup> Jens Beckmann<sup>\*a</sup>

*<sup>a</sup>Institut für Anorganische Chemie und Kristallographie, Universität Bremen, Leobener Str. 7,  
28359 Bremen*

*<sup>b</sup>Institut für Organische und Analytische Chemie, Universität Bremen, Leobener Str. 7, 28359  
Bremen*

## Table of Contents

|     |                                                                                                                       |    |
|-----|-----------------------------------------------------------------------------------------------------------------------|----|
| 1   | Experimental section .....                                                                                            | 2  |
| 1.1 | General Considerations.....                                                                                           | 2  |
| 1.2 | Preparation of $[\text{Fc}_2\text{P}(\text{SPh})_2][\text{B}(\text{C}_6\text{F}_5)_4]$ ( <b>1</b> ) .....             | 3  |
| 1.3 | Preparation of $[\text{Fc}_2\text{P}(\text{SePh})_2][\text{B}(\text{C}_6\text{F}_5)_4]$ ( <b>2</b> ) .....            | 4  |
| 1.4 | Preparation of $[\text{Fc}_2\text{P}(\text{TePh})_2][\text{B}(\text{C}_6\text{F}_5)_4]$ ( <b>3</b> ) .....            | 5  |
| 1.5 | Preparation of $[\text{Fc}_2\text{P}(\text{SeFc})_2][\text{B}(\text{C}_6\text{F}_5)_4]$ ( <b>4</b> ) .....            | 6  |
| 1.6 | Preparation of $[\text{Fc}_2\text{P}(\text{Se}_2\text{biphen})][\text{B}(\text{C}_6\text{F}_5)_4]$ ( <b>5</b> ) ..... | 7  |
| 2   | NMR Spectra.....                                                                                                      | 8  |
| 2.1 | $[\text{Fc}_2\text{P}(\text{SPh})_2][\text{B}(\text{C}_6\text{F}_5)_4]$ ( <b>1</b> ) .....                            | 8  |
| 2.2 | $[\text{Fc}_2\text{P}(\text{SePh})_2][\text{B}(\text{C}_6\text{F}_5)_4]$ ( <b>2</b> ) .....                           | 11 |
| 2.3 | $[\text{Fc}_2\text{P}(\text{TePh})_2][\text{B}(\text{C}_6\text{F}_5)_4]$ ( <b>3</b> ) .....                           | 14 |
| 2.4 | $[\text{Fc}_2\text{P}(\text{SeFc})_2][\text{B}(\text{C}_6\text{F}_5)_4]$ ( <b>4</b> ).....                            | 18 |
| 2.5 | $[\text{Fc}_2\text{P}(\text{Se}_2\text{biphen})][\text{B}(\text{C}_6\text{F}_5)_4]$ ( <b>5</b> ) .....                | 21 |
| 3   | Michael addition.....                                                                                                 | 25 |
| 3.1 | General Procedure .....                                                                                               | 25 |
| 4   | Crystallographic Data .....                                                                                           | 32 |
| 5   | Computational Details.....                                                                                            | 36 |
| 6   | References .....                                                                                                      | 37 |

# 1 Experimental section

## 1.1 General Considerations

All the reactions, manipulations work-up and purifications were performed under inert argon atmosphere using anhydrous solvents. The reagents used in this work including  $\text{Ph}_2\text{E}_2$  ( $\text{E} = \text{S}, \text{Se}, \text{Te}$ ), 1-methylindole, *trans*- $\beta$ -crotonophenone and  $\text{Et}_4\text{Si}$  were obtained commercially and used as received.  $[\text{Fc}_2\text{P}][\text{B}(\text{C}_6\text{F}_5)_4]$ ,<sup>S1</sup>  $\text{Fc}_2\text{Se}_2$ <sup>S2</sup> and biphen $\text{Se}_2$  (dibenzo[1,2]diselenine),<sup>S3</sup> were prepared following the procedures described in the literature. Anhydrous dichloromethane, *n*-hexane, *n*-pentane and toluene were collected from an SPS800 mBraun solvent purification system and stored over 3 Å molecular sieves. Diethyl ether was dried by heating at reflux over Na/benzophenone under argon atmosphere. Deuterated solvents were degassed and dried over 3 Å molecular sieves under argon. Other solvents, such as 1,2-difluorobenzene, were dried directly over 3 Å molecular sieves.

Unless otherwise noted, NMR spectra were recorded at room temperature on a Bruker Avance Neo 600 MHz spectrometer.  $^1\text{H}$ ,  $^{13}\text{C}\{^1\text{H}\}$ ,  $^{11}\text{B}$ ,  $^{19}\text{F}$ ,  $^{31}\text{P}$   $^{77}\text{Se}$  and  $^{125}\text{Te}$  NMR spectra are reported on the  $\delta$  scale (ppm) and are referenced against  $\text{SiMe}_4$ ,  $\text{BF}_3 \cdot \text{Et}_2\text{O}$  (15% in  $\text{CDCl}_3$ ),  $\text{CFCl}_3$ ,  $\text{H}_3\text{PO}_4$  (85% in water),  $\text{Me}_2\text{Se}$  and  $\text{Me}_2\text{Te}$  respectively.  $^1\text{H}$  and  $^{13}\text{C}\{^1\text{H}\}$  chemical shifts are referenced to the residual peak of the solvent ( $\text{CDHCl}_2$  5.32 ppm for  $\text{CD}_2\text{Cl}_2$ ) in the  $^1\text{H}$  NMR spectra, and to the peak of the deuterated solvent ( $\text{CD}_2\text{Cl}_2$  53.84 ppm) in the  $^{13}\text{C}\{^1\text{H}\}$  NMR spectra.<sup>S4</sup>

The ESI HRMS spectra were measured on a Bruker Impact II spectrometer. Dichloromethane or dichloromethane/acetonitrile solutions ( $c = 1 \cdot 10^{-5} \text{ mol} \cdot \text{L}^{-1}$ ) were injected directly into the spectrometer at a flow rate of  $3 \mu\text{L} \cdot \text{min}^{-1}$ . Nitrogen was used both as a drying gas and for nebulization with flow rates of approximately  $5 \text{ L} \cdot \text{min}^{-1}$  and a pressure of 5 psi. Pressure in the mass analyser region was usually about  $1 \cdot 10^{-5} \text{ mbar}$ . Spectra were collected for 1 min and averaged. The nozzle-skimmer voltage was adjusted individually for each measurement.

UV-Vis absorption spectra were recorded on a VWR UV-1600PC spectrophotometer, and analysed using Spectragryph software.<sup>S5</sup> Melting points were determined on a SCHORPP Gerätetechnik MPM-H3, using one end closed capillary tubes, the other end was closed with silicon grease.

## 1.2 Preparation of $[\text{Fc}_2\text{P}(\text{SPh})_2][\text{B}(\text{C}_6\text{F}_5)_4]$ (**1**)

$[\text{Fc}_2\text{P}][\text{B}(\text{C}_6\text{F}_5)_4]$  (103 mg, 95.4  $\mu\text{mol}$ , 1.0 eq.) and  $\text{Ph}_2\text{S}_2$  (23 mg, 105  $\mu\text{mol}$ , 1.1 eq.) were dissolved in dichloromethane (6 mL) and stirred for 48 h at 60 °C. The reaction mixture turned orange, and the solvent was evaporated to dryness. The dark yellow solid was washed with hexane (4  $\times$  5 mL) and dried under reduced pressure. The title product was obtained as a yellow solid (120 mg, 92.4  $\mu\text{mol}$ , 97%). Crystals of **1** were obtained by layering a  $\text{CH}_2\text{Cl}_2$  solution with *n*-hexane (V:V, 1:3).

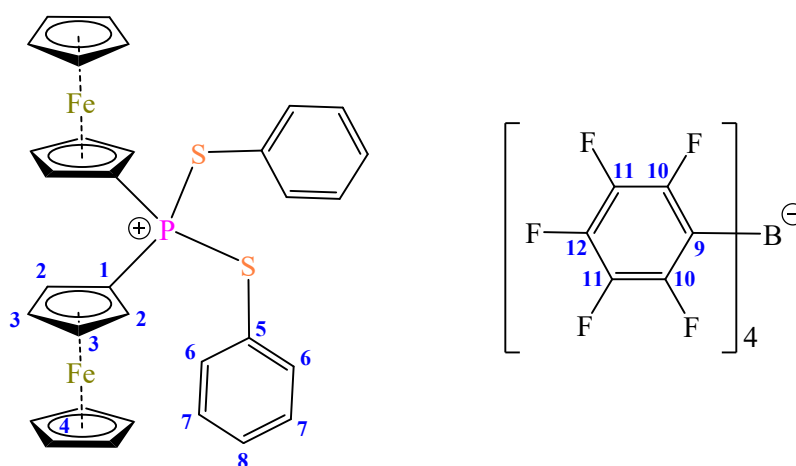

**Figure S1.** Numbering scheme for  $[\text{Fc}_2\text{P}(\text{SPh})_2][\text{B}(\text{C}_6\text{F}_5)_4]$  (**1**).

**M.p.** = 152–153 °C (decomp.)  **$^1\text{H}$  NMR (600 MHz,  $\text{CD}_2\text{Cl}_2$ ):**  $\delta$  (ppm) = 7.63 (t,  $^1J(^1\text{H}-^1\text{H}) = 7$  Hz, 2H, H8), 7.58 (d,  $^1J(^1\text{H}-^1\text{H}) = 8$  Hz, 4H, H6), 7.53 (t,  $^1J(^1\text{H}-^1\text{H}) = 8$  Hz, 4H, H7), 4.80 (s, br, 4H, H3), 4.50 (s, br, 4H, H2), 4.20 (s, 10H, H4).  **$^{13}\text{C}\{^1\text{H}\}$  NMR (151 MHz,  $\text{CD}_2\text{Cl}_2$ ):**  $\delta$  (ppm) = 148.6 (dm,  $^1J(^{13}\text{C}-^{19}\text{F}) = 241$  Hz, C11), 138.7 (dm,  $^1J(^{13}\text{C}-^{19}\text{F}) = 245$  Hz, C12), 137.8 (d, C6), 136.7 (dm,  $^1J(^{13}\text{C}-^{19}\text{F}) = 245$  Hz, C10), 132.8 (d, C8), 131.0 (s, C7), 124.4 (s, br, C9), 122.8 (d,  $^1J(^{13}\text{C}-^{31}\text{P}) = 7$  Hz, C5), 75.6 (d,  $^3J(^{13}\text{C}-^{31}\text{P}) = 12$  Hz, C3), 73.1 (d,  $^2J(^{13}\text{C}-^{31}\text{P}) = 14$  Hz, C2), 72.1 (s, C4), 64.4 ( $^1J(^{13}\text{C}-^{31}\text{P}) = 99$  Hz, C1).  **$^{19}\text{F}$  NMR (565 MHz,  $\text{CD}_2\text{Cl}_2$ ):**  $\delta$  = -133.1 (s, br, 8F, F11), -163.6 (t,  $^3J(^{19}\text{F}-^{19}\text{F}) = 20$  Hz, 4F, F12), -167.5 (t,  $^3J(^{19}\text{F}-^{19}\text{F}) = 19$  Hz, 8F, F10).  **$^{11}\text{B}$  NMR (193 MHz,  $\text{CD}_2\text{Cl}_2$ ):**  $\delta$  = -16.7 (s).  **$^{31}\text{P}\{^1\text{H}\}$  NMR (243 MHz,  $\text{CD}_2\text{Cl}_2$ ):**  $\delta$  (ppm) = 81.4 (s). **HRMS ESI ( $m/z$ ):**  $[\text{M}]^+$  calculated for  $\text{C}_{32}\text{H}_{28}\text{Fe}_2\text{PS}_2$  619.0063, found 619.0055.

### 1.3 Preparation of $[\text{Fc}_2\text{P}(\text{SePh})_2][\text{B}(\text{C}_6\text{F}_5)_4]$ (**2**)

$[\text{Fc}_2\text{P}][\text{B}(\text{C}_6\text{F}_5)_4]$  (107 mg, 99.1  $\mu\text{mol}$ , 1.0 eq.) and  $\text{Ph}_2\text{Se}_2$  (34 mg, 109  $\mu\text{mol}$ , 1.1 eq.) were combined in a Schlenk and dissolved in dichloromethane (6 mL). The reaction mixture was stirred for 3 h at room temperature for full conversion (orange solution). The solvent was evaporated under reduced pressure and the solid was washed with hexane ( $4 \times 5$  mL). The title product was dried under vacuum and was obtained as an orange solid (110 mg, 78.9  $\mu\text{mol}$ , 80%). Crystals of **2** were grown from a saturated solution in  $\text{CH}_2\text{Cl}_2$  at  $-30$   $^\circ\text{C}$ .

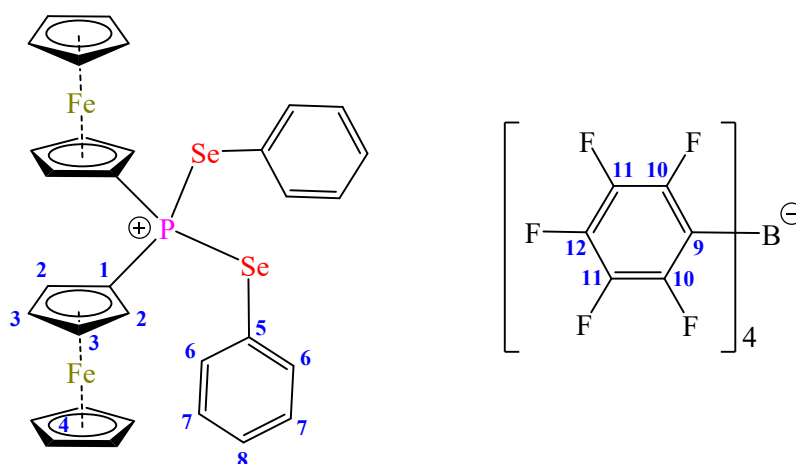

**Figure S2.** Numbering scheme for  $[\text{Fc}_2\text{P}(\text{SePh})_2][\text{B}(\text{C}_6\text{F}_5)_4]$  (**2**).

**M.p.** = 191–192  $^\circ\text{C}$ .  **$^1\text{H}$  NMR (600 MHz,  $\text{CD}_2\text{Cl}_2$ ):**  $\delta$  (ppm) = 7.61 (m, 6H,  $H_8$  and  $H_6$ ), 7.50 (t, 4H,  $H_7$ ), 4.80 (s, br, 4H,  $H_3$ ), 4.47 (s, br, 4H,  $H_2$ ), 4.18 (s, 10H,  $H_4$ ).  **$^{13}\text{C}\{^1\text{H}\}$  NMR (151 MHz,  $\text{CD}_2\text{Cl}_2$ ):**  $\delta$  (ppm) = 148.7 (dm,  $^1J(^{13}\text{C}-^{19}\text{F}) = 241$  Hz, C11), 138.8 (dm,  $^1J(^{13}\text{C}-^{19}\text{F}) = 245$  Hz, C12), 138.4 (d,  $^4J(^{13}\text{C}-^{31}\text{P}) = 4$  Hz, C7), 136.9 (dm,  $^1J(^{13}\text{C}-^{19}\text{F}) = 245$  Hz, C10), 132.5 (d,  $^5J(^{13}\text{C}-^{31}\text{P}) = 3$  Hz, C8), 131.1 (d,  $^3J(^{13}\text{C}-^{31}\text{P}) = 3$  Hz, C6), 124.6 (s, br, C9), 122.8 (d,  $^1J(^{13}\text{C}-^{77}\text{Se}) = 6$  Hz, C5), 75.4 (d,  $^3J(^{13}\text{C}-^{31}\text{P}) = 11$  Hz, C3), 73.3 (d,  $^2J(^{13}\text{C}-^{31}\text{P}) = 14$  Hz, C2), 72.0 (s, C4), 66.3 (d,  $^1J(^{13}\text{C}-^{31}\text{P}) = 78$  Hz, C1).  **$^{11}\text{B}$  NMR (193 MHz,  $\text{CD}_2\text{Cl}_2$ ):**  $\delta$  (ppm) = 16.6 (s).  **$^{19}\text{F}$  NMR (565 MHz,  $\text{CD}_2\text{Cl}_2$ ):**  $\delta$  (ppm) = -133.1 (s, br, 8F, F11), -163.7 (t,  $^3J(^{19}\text{F}-^{19}\text{F}) = 20$  Hz, 4F, F12), -167.5 (t,  $^3J(^{19}\text{F}-^{19}\text{F}) = 19$  Hz, 8F, F10).  **$^{31}\text{P}\{^1\text{H}\}$  NMR (243 MHz,  $\text{CD}_2\text{Cl}_2$ ):**  $\delta$  (ppm) = 57.0 (s,  $^1J(^{31}\text{P}-^{77}\text{Se}) = 475$  Hz).  **$^{77}\text{Se}$  NMR (114 MHz,  $\text{CD}_2\text{Cl}_2$ ):**  $\delta$  (ppm) = 399.2 (d,  $^1J(^{77}\text{Se}-^{31}\text{P}) = 475$  Hz). **HRMS ESI (m/z):**  $[\text{M}]^+$  calculated for  $\text{C}_{32}\text{H}_{28}\text{Fe}_2\text{PSe}_2$  714.8952, found 714.8966.

#### 1.4 Preparation of $[\text{Fc}_2\text{P}(\text{TePh})_2][\text{B}(\text{C}_6\text{F}_5)_4]$ (3)

[Fc<sub>2</sub>P][B(C<sub>6</sub>F<sub>5</sub>)<sub>4</sub>] (78 mg, 72.2 μmol, 1.0 eq.) and Te<sub>2</sub>Ph<sub>2</sub> (32 mg, 78.2 μmol, 1.1 eq.) were dissolved in dichloromethane (6 mL) and stirred for 48 h at room temperature. (When the reaction is followed by NMR, the title product is formed immediately, but there is always a small residue of phosphonium left). The solvent was evaporated and the solid was washed with hexane (4 × 5 mL). The product was dried under vacuum to obtain a dark red solid (87 mg, 58.4 μmol, 81%). Crystals of **3** (bright red) were obtained by liquid-to-liquid diffusion at –30 °C (a solution of **3** in CH<sub>2</sub>Cl<sub>2</sub> layered with *n*-pentane, V:V, 1:3).

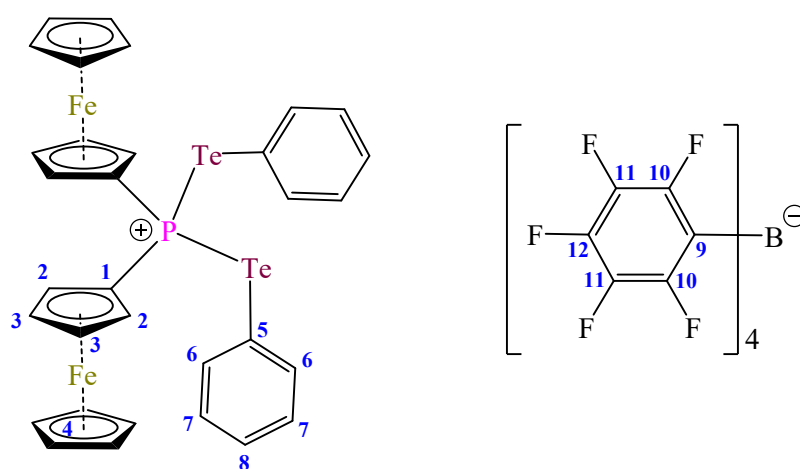

**Figure S3.** Numbering scheme for  $[\text{Fc}_2\text{P}(\text{TePh})_2][\text{B}(\text{C}_6\text{F}_5)_4](\mathbf{3})$ .

**M.p.** = 149–150 °C (decomp.). **<sup>1</sup>H NMR (600 MHz, CD<sub>2</sub>Cl<sub>2</sub>):** δ (ppm) = 7.80 (t, br, <sup>3</sup>J(<sup>1</sup>H–<sup>1</sup>H) = 9 Hz, 4H, *H*6), 7.61 (t, <sup>3</sup>J(<sup>1</sup>H–<sup>1</sup>H) = 7 Hz, 2H, *H*8), 7.43 (t, <sup>3</sup>J(<sup>1</sup>H–<sup>1</sup>H) = 8 Hz, 4H, *H*7), 4.78 (s, 4H, *H*3), 4.42 (s, 4H, *H*2), 4.17 (s, 10H, *H*4). **<sup>13</sup>C{<sup>1</sup>H} NMR (151 MHz, CD<sub>2</sub>Cl<sub>2</sub>):** δ (ppm) = 148.6 (dm, <sup>1</sup>J(<sup>13</sup>C–<sup>19</sup>F) = 242 Hz, *C*11), 142.4 (d, <sup>3</sup>J(<sup>13</sup>C–<sup>31</sup>P) = 2 Hz, *C*6), 138.7 (dm, <sup>1</sup>J(<sup>13</sup>C–<sup>19</sup>F) = 245 Hz, *C*12), 136.8 (dm, <sup>1</sup>J(<sup>13</sup>C–<sup>19</sup>F) = 246 Hz, *C*10), 132.3 (d, <sup>5</sup>J(<sup>13</sup>C–<sup>31</sup>P) = 3 Hz, *C*8), 131.4 (d, <sup>4</sup>J(<sup>13</sup>C–<sup>31</sup>P) = 3 Hz, *C*7), 75.0 (d, <sup>3</sup>J(<sup>13</sup>C–<sup>31</sup>P) = 10 Hz, *C*3), 74.0 (d, <sup>2</sup>J(<sup>13</sup>C–<sup>31</sup>P) = 13 Hz, *C*2), 71.7 (s, *C*4), 69.0 (d, <sup>1</sup>J(<sup>13</sup>C–<sup>31</sup>P) = 56 Hz, *C*1). **<sup>11</sup>B NMR (193 MHz, CD<sub>2</sub>Cl<sub>2</sub>):** δ (ppm) = 16.7 (s). **<sup>19</sup>F NMR (565 MHz, CD<sub>2</sub>Cl<sub>2</sub>):** δ (ppm) = –133.1 (s, br, 8F, *F*11), –163.7 (t, <sup>3</sup>J(<sup>19</sup>F–<sup>19</sup>F) = 20 Hz, 4F, *F*12), –167.5 (t, <sup>3</sup>J(<sup>19</sup>F–<sup>19</sup>F) = 19 Hz, 8F, *F*10). **<sup>31</sup>P{<sup>1</sup>H} NMR (243 MHz, CD<sub>2</sub>Cl<sub>2</sub>):** δ (ppm) = –22.8 (s, <sup>1</sup>J(<sup>31</sup>P–<sup>125</sup>Te) = 1041 Hz, <sup>1</sup>J(<sup>31</sup>P–<sup>123</sup>Te) = 870 Hz). **<sup>125</sup>Te NMR (189 MHz, CD<sub>2</sub>Cl<sub>2</sub>):** δ (ppm) = 780.8 (d, <sup>1</sup>J(<sup>125</sup>Te–<sup>31</sup>P) = 1041 Hz). Attempted characterisation by high resolution mass spectrometry (ESI, APCI, LIFDI) was unsuccessful and yielded only decomposition fragments.

## 1.5 Preparation of $[\text{Fc}_2\text{P}(\text{SeFc})_2][\text{B}(\text{C}_6\text{F}_5)_4]$ (**4**)

$[\text{Fc}_2\text{P}][\text{B}(\text{C}_6\text{F}_5)_4]$  (103 mg, 95.4  $\mu\text{mol}$ , 1.0 eq.) and  $\text{Fc}_2\text{Se}_2$  (56 mg, 106  $\mu\text{mol}$ , 1.1 eq.) were dissolved in dichloromethane (6 mL) at  $-80^\circ\text{C}$ . The solution was stirred 48 h at room temperature. The solvent of the dark red solution was evaporated under vacuum and the solid was washed with *n*-hexane ( $4 \times 5$  mL). The solvent was removed under reduced pressure. The product was obtained as a red/ brown powder (138 mg, 85.8  $\mu\text{mol}$ , 90%). Single crystals of the title product were obtained by layering a solution of **4** in dichloromethane with *n*-hexane at  $-30^\circ\text{C}$ .

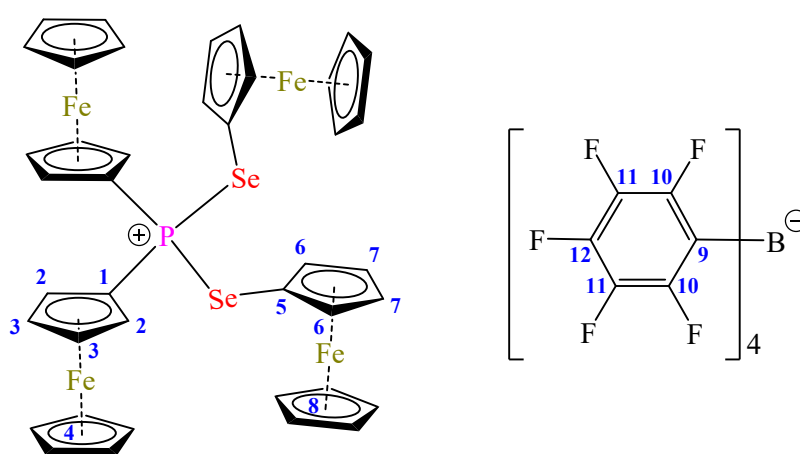

**Figure S4.** Numbering scheme for  $[\text{Fc}_2\text{P}(\text{SeFc})_2][\text{B}(\text{C}_6\text{F}_5)_4]$  (**4**).

**M.p.** = 158–159  $^\circ\text{C}$ .  $^1\text{H}$  NMR (600 MHz,  $\text{CD}_2\text{Cl}_2$ ):  $\delta$  (ppm) = 4.75 (s, 4H, *H*3), 4.50 (s, 4H, *H*7), 4.43 (s, 4H, *H*2), 4.37 (s, 4H, *H*6), 4.35 (s, 10H, *H*4), 4.20 (s, 10H, *H*8).  $^{13}\text{C}\{^1\text{H}\}$  NMR (151 MHz,  $\text{CD}_2\text{Cl}_2$ ):  $\delta$  (ppm) = 148.7 (dm,  $^1J(^{13}\text{C}-^{19}\text{F}) = 240$  Hz, C11), 138.8 (dm,  $^1J(^{13}\text{C}-^{19}\text{F}) = 244$  Hz, C12), 136.8 (dm,  $^1J(^{13}\text{C}-^{19}\text{F}) = 245$  Hz, C10), 124.6 (s, br, C9), 76.8 (s, C7), 74.9 (d,  $^3J(^{13}\text{C}-^{31}\text{P}) = 11$  Hz, C3), 73.3 (d,  $^2J(^{13}\text{C}-^{31}\text{P}) = 13$  Hz, C2), 72.8 (s, C6), 71.7 (s, C4), 70.8 (s, C8), 66.3 (d,  $^1J(^{13}\text{C}-^{31}\text{P}) = 70$  Hz, C1), 65.9 (s, C5).  $^{11}\text{B}$  NMR (193 MHz,  $\text{CD}_2\text{Cl}_2$ ):  $\delta$  (ppm) = 17.2 (s).  $^{19}\text{F}$  NMR (565 MHz,  $\text{CD}_2\text{Cl}_2$ ):  $\delta$  (ppm) = -133.9 (s, br, 8F, F11), -164.0 (t,  $^3J(^{19}\text{F}-^{19}\text{F}) = 20$  Hz, 4F, F12), -168.2 (t,  $^3J(^{19}\text{F}-^{19}\text{F}) = 16$  Hz, 8F, F10).  $^{31}\text{P}\{^1\text{H}\}$  NMR (243 MHz,  $\text{CD}_2\text{Cl}_2$ ):  $\delta$  (ppm) = 47.5 (s,  $^1J(^{31}\text{P}-^{77}\text{Se}) = 498$  Hz).  $^{77}\text{Se}$  NMR (114 MHz,  $\text{CD}_2\text{Cl}_2$ ):  $\delta$  (ppm) = 325.7 (d,  $^1J(^{77}\text{Se}-^{31}\text{P}) = 498$  Hz). **HRMS ESI** (*m/z*):  $[\text{M}]^+$  calculated for  $\text{C}_{40}\text{H}_{36}\text{Fe}_4\text{PSe}_2$  930.8277, found 930.8287.

## 1.6 Preparation of $[\text{Fc}_2\text{P}(\text{Se}_2\text{biphen})][\text{B}(\text{C}_6\text{F}_5)_4]$ (**5**)

$[\text{Fc}_2\text{P}][\text{B}(\text{C}_6\text{F}_5)_4]$  (523 mg, 484  $\mu\text{mol}$ , 1.0 eq.) and  $\text{Se}_2\text{biphen}$  (151 mg, 484  $\mu\text{mol}$ , 1.0 eq.) were dissolved in dichloromethane (7 mL) at  $-80^\circ\text{C}$ , then the reaction mixture was stirred overnight at room temperature. The solvent of the dark yellow solution was removed under vacuum. The resulted brown oil was washed with hexane ( $4 \times 5$  mL), then dried under reduced pressure to obtain a yellow solid (465 mg, 334  $\mu\text{mol}$ , 69%). Single crystals of the product were obtained by layering a solution of **5** in  $\text{CH}_2\text{Cl}_2$  with *n*-hexane.

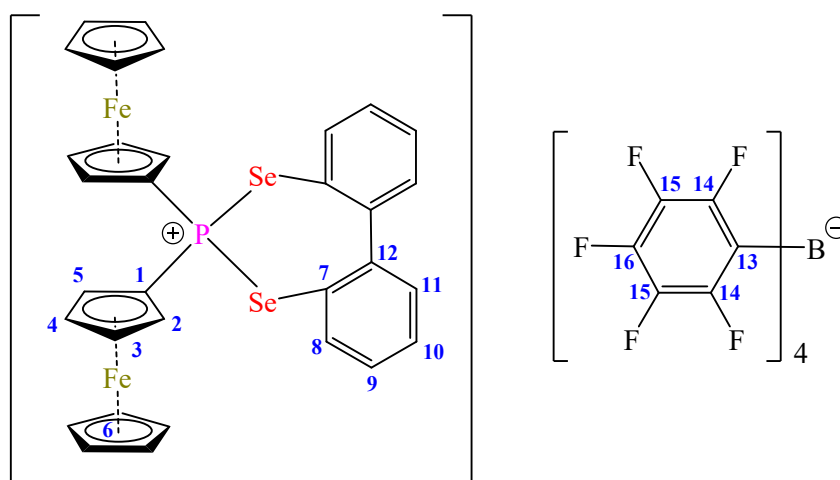

**Figure S5.** Numbering scheme for  $[\text{Fc}_2\text{P}(\text{Se}_2\text{biphen})][\text{B}(\text{C}_6\text{F}_5)_4]$  (**5**).

**M.p.** = 189–190  $^\circ\text{C}$ .  $^1\text{H}$  NMR (600 MHz,  $\text{CD}_2\text{Cl}_2$ ):  $\delta$  (ppm) = 7.76 (m, 2H, *H*10), 7.69 (d, 2H, *H*8), 7.60 (d, 2H, *H*11), 7.51 (t, 2H, *H*9), 4.93 (s, 2H), 4.85 (s, 2H), 4.82 (s, 2H), 4.30 (s, 10H, *H*6), 4.25 (s, 2H).  $^{13}\text{C}\{^1\text{H}\}$  NMR (151 MHz,  $\text{CD}_2\text{Cl}_2$ ):  $\delta$  (ppm) = 148.7 (dm,  $^1J(^{13}\text{C}-^{19}\text{F}) = 241$  Hz, C15), 146.7 (s, C12), 138.8 (dm,  $^1J(^{13}\text{C}-^{19}\text{F}) = 245$  Hz, C16), 138.3 (s, C8), 136.9 (dm,  $^1J(^{13}\text{C}-^{19}\text{F}) = 245$  Hz, C14), 133.2 (d, C10), 131.8 (d, C11), 130.7 (d, C9), 126.2 (d, C7), 124.4 (s, br, C13), 76.2 (d,  $^3J(^{13}\text{C}-^{31}\text{P}) = 11$  Hz), 75.4 (d,  $^3J(^{13}\text{C}-^{31}\text{P}) = 12$  Hz), 73.9 (d,  $^2J(^{13}\text{C}-^{31}\text{P}) = 17$  Hz), 72.9 (d,  $^2J(^{13}\text{C}-^{31}\text{P}) = 13$  Hz), 72.2 (s, C6), 64.2 (d,  $^1J(^{13}\text{C}-^{31}\text{P}) = 77$  Hz, C1).  $^{11}\text{B}$  NMR (193 MHz,  $\text{CD}_2\text{Cl}_2$ ):  $\delta$  (ppm) = 16.6 (s).  $^{19}\text{F}$  NMR (565 MHz,  $\text{CD}_2\text{Cl}_2$ ):  $\delta$  (ppm) = -133.0 (s, br, 8F, F15), -163.5 (t,  $^3J(^{19}\text{F}-^{19}\text{F}) = 20$  Hz, 4F, F16), -167.4 (t,  $^3J(^{19}\text{F}-^{19}\text{F}) = 19$  Hz, 8F, F14).  $^{31}\text{P}\{^1\text{H}\}$  NMR (243 MHz,  $\text{CD}_2\text{Cl}_2$ ):  $\delta$  (ppm) = 74.9 (s,  $^1J(^{31}\text{P}-^{77}\text{Se}) = 444$  Hz).  $^{77}\text{Se}$  NMR (114 MHz,  $\text{CD}_2\text{Cl}_2$ ):  $\delta$  (ppm) = 378.8 (d,  $^1J(^{77}\text{Se}-^{31}\text{P}) = 444$  Hz). **HRMS ESI** (*m/z*): [*M*] $^+$  calculated for  $\text{C}_{32}\text{H}_{26}\text{Fe}_2\text{PSe}_2$  712.8796, found 712.8785.

## 2 NMR Spectra

### 2.1 $[\text{Fc}_2\text{P}(\text{SPh})_2][\text{B}(\text{C}_6\text{F}_5)_4]$ (**1**)

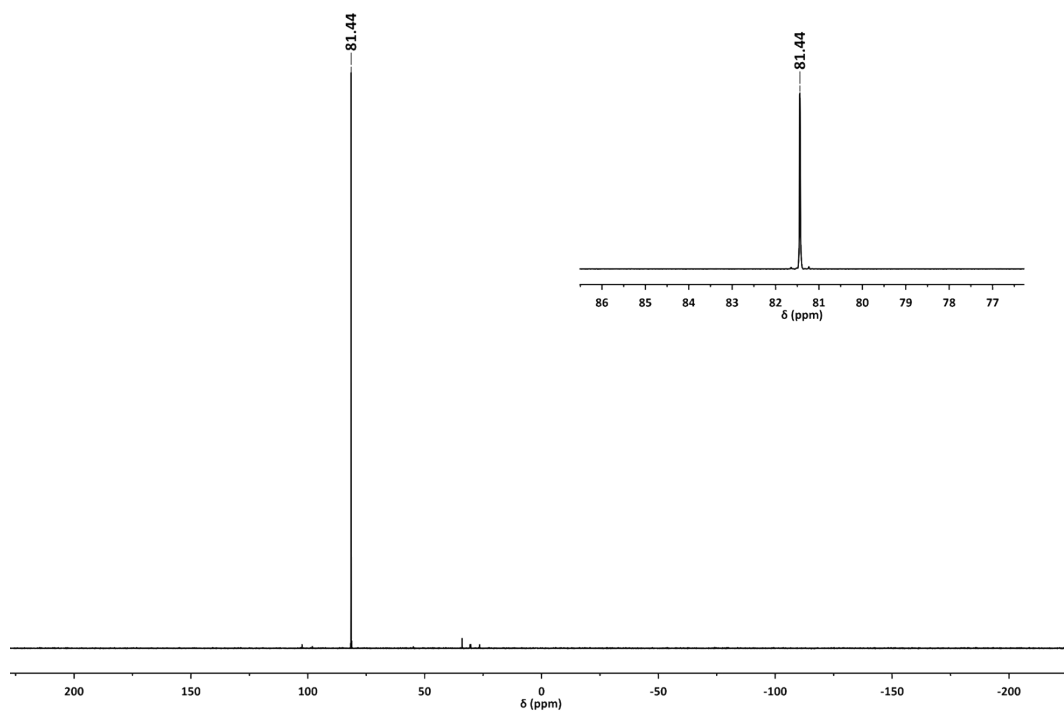

**Figure S6.**  $^{31}\text{P}\{^1\text{H}\}$  NMR ( $\text{CD}_2\text{Cl}_2$ , 243 MHz) spectrum of  $[\text{Fc}_2\text{P}(\text{SPh})_2][\text{B}(\text{C}_6\text{F}_5)_4]$  (**1**).

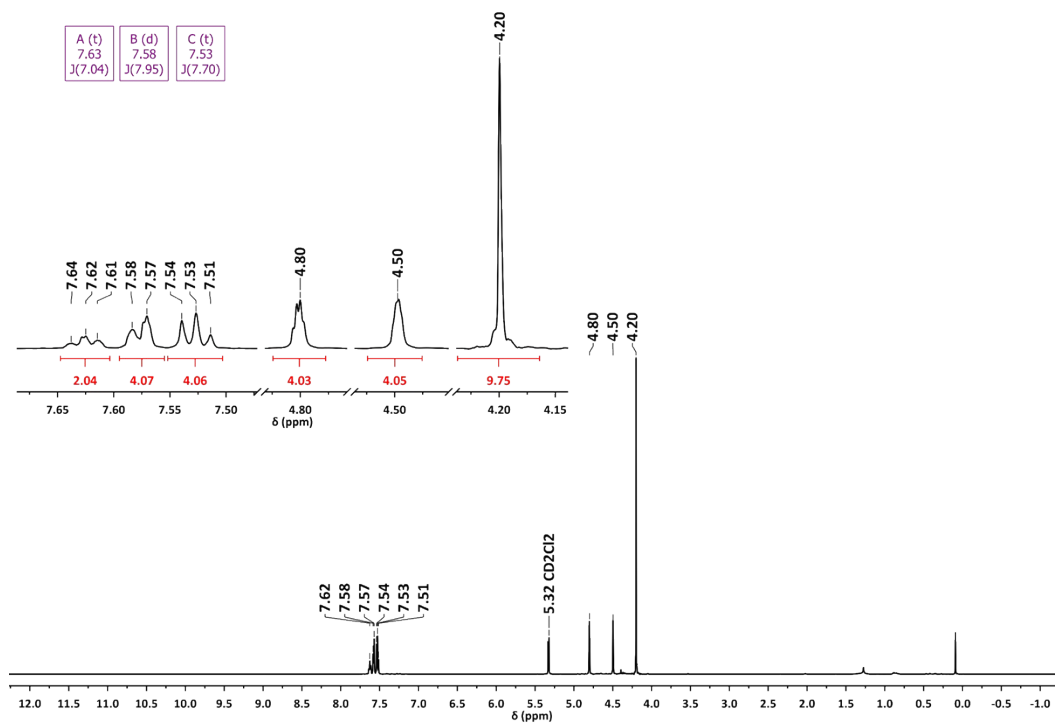

**Figure S7.**  $^1\text{H}$  NMR ( $\text{CD}_2\text{Cl}_2$ , 600 MHz) spectrum of  $[\text{Fc}_2\text{P}(\text{SPh})_2][\text{B}(\text{C}_6\text{F}_5)_4]$  (**1**).

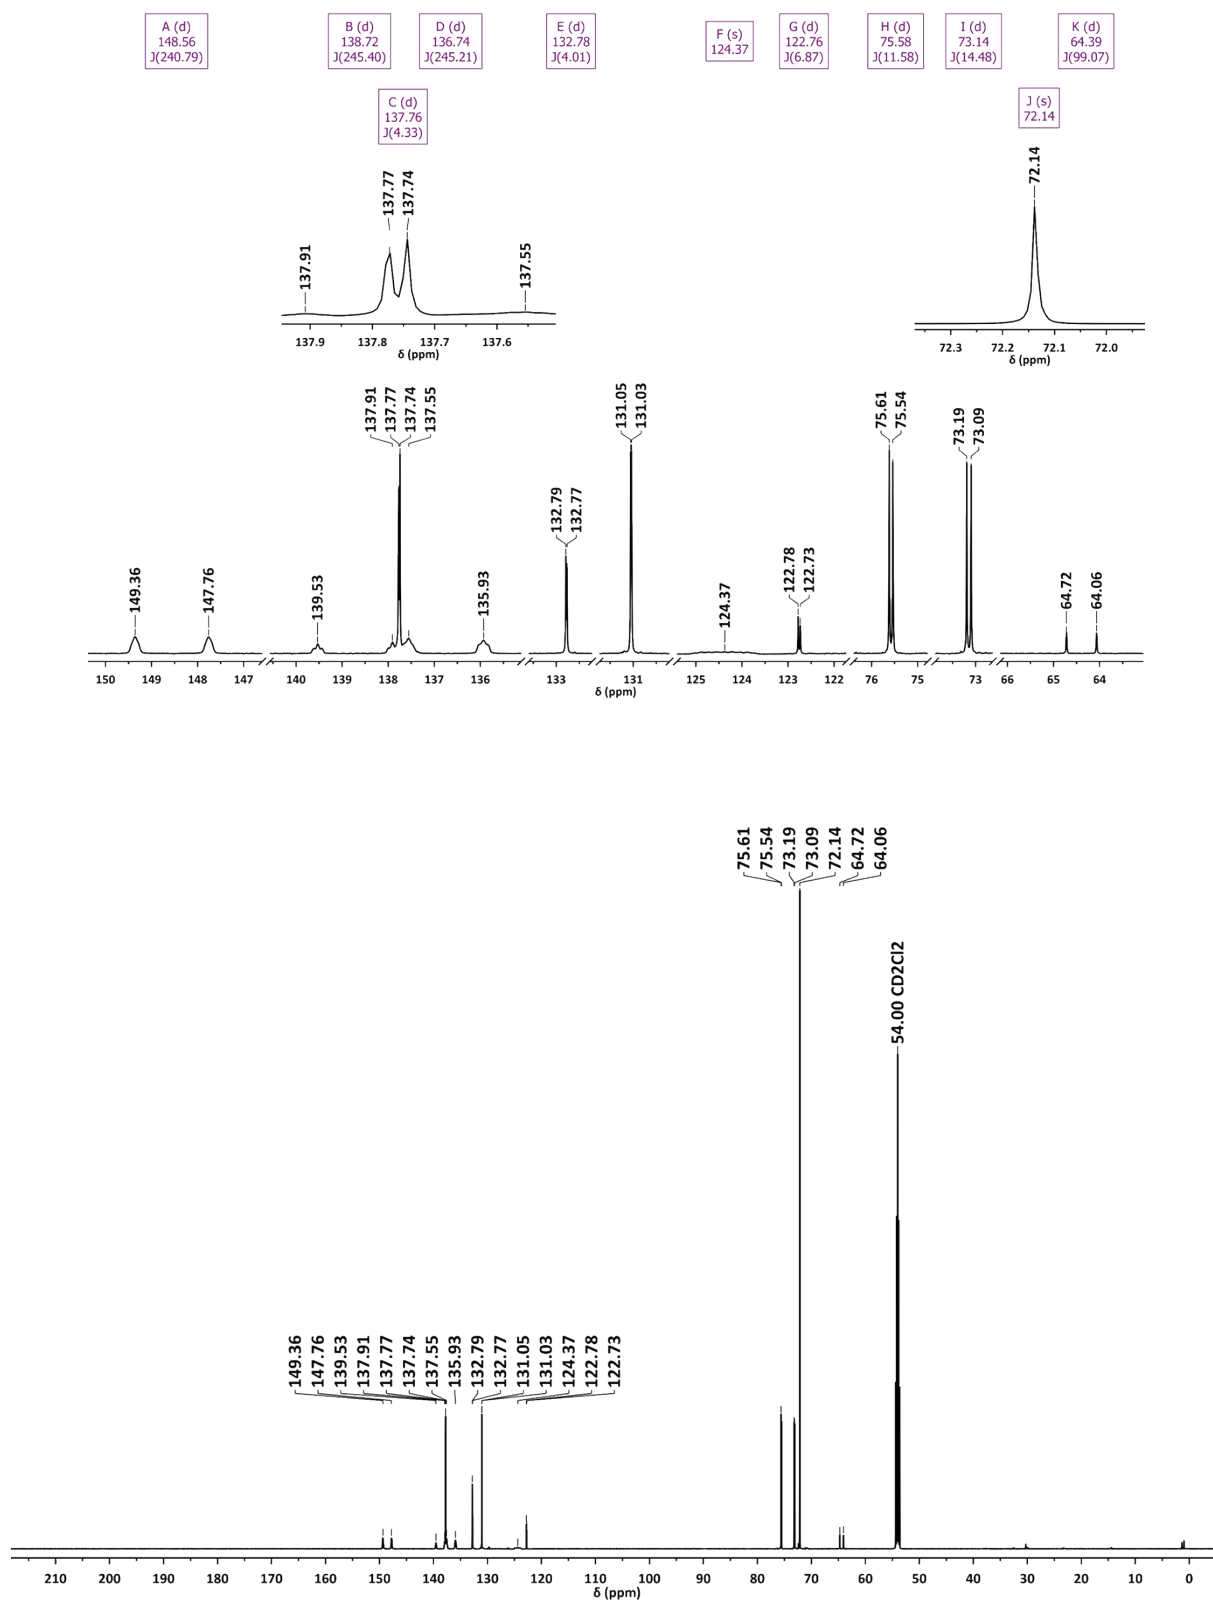

**Figure S8.**  $^{13}\text{C}\{^1\text{H}\}$  NMR ( $\text{CD}_2\text{Cl}_2$ , 151 MHz) spectra of  $[\text{Fc}_2\text{P}(\text{SPh})_2][\text{B}(\text{C}_6\text{F}_5)_4]$  (**1**).

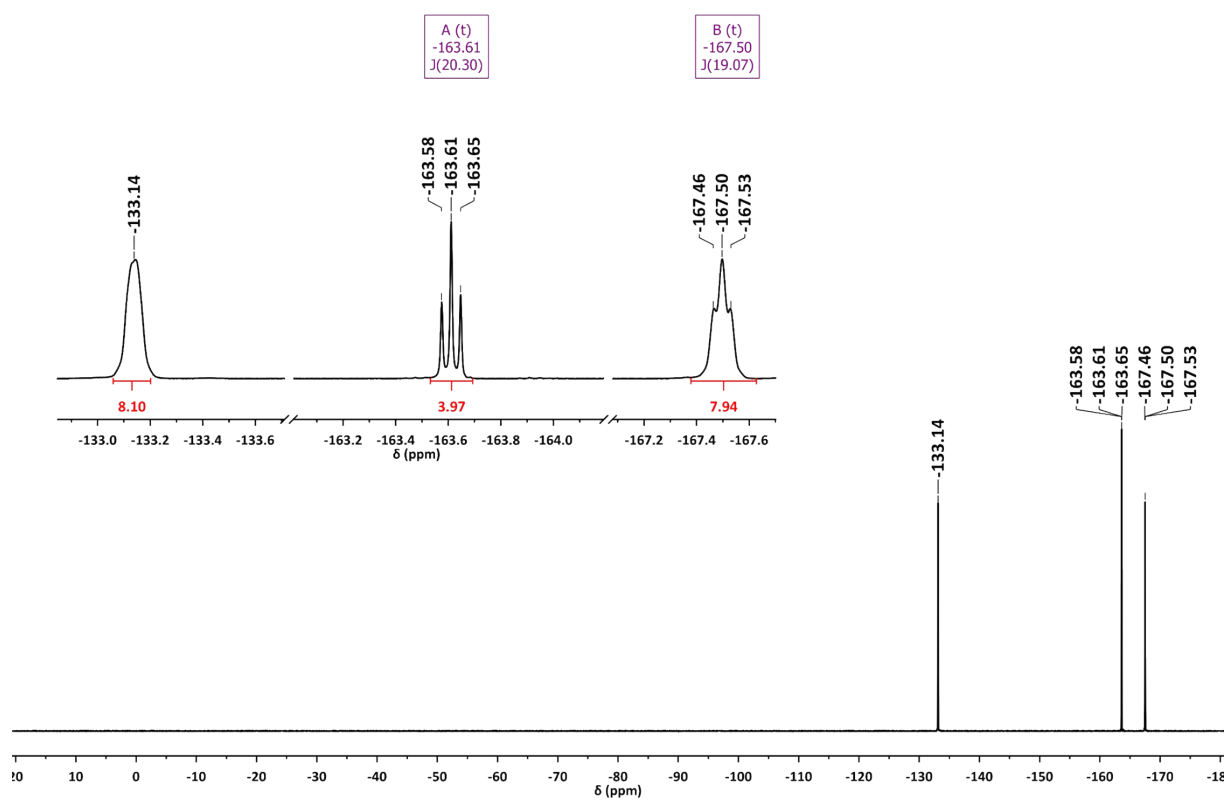

**Figure S9.**  $^{19}\text{F}$  NMR ( $\text{CD}_2\text{Cl}_2$ , 565 MHz) spectrum of  $[\text{Fc}_2\text{P}(\text{SPh})_2][\text{B}(\text{C}_6\text{F}_5)_4]$  (1).

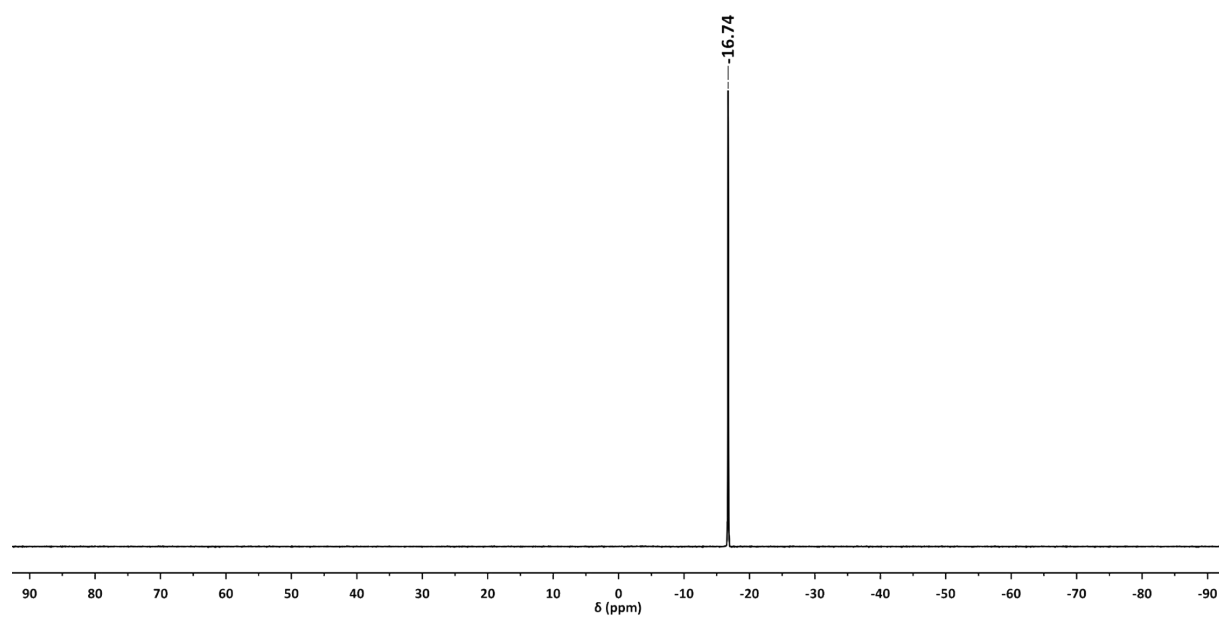

**Figure S10.**  $^{11}\text{B}$  NMR ( $\text{CD}_2\text{Cl}_2$ , 193 MHz) spectrum of  $[\text{Fc}_2\text{P}(\text{SPh})_2][\text{B}(\text{C}_6\text{F}_5)_4]$  (1).

## 2.2 $[\text{Fc}_2\text{P}(\text{SePh})_2][\text{B}(\text{C}_6\text{F}_5)_4]$ (2)

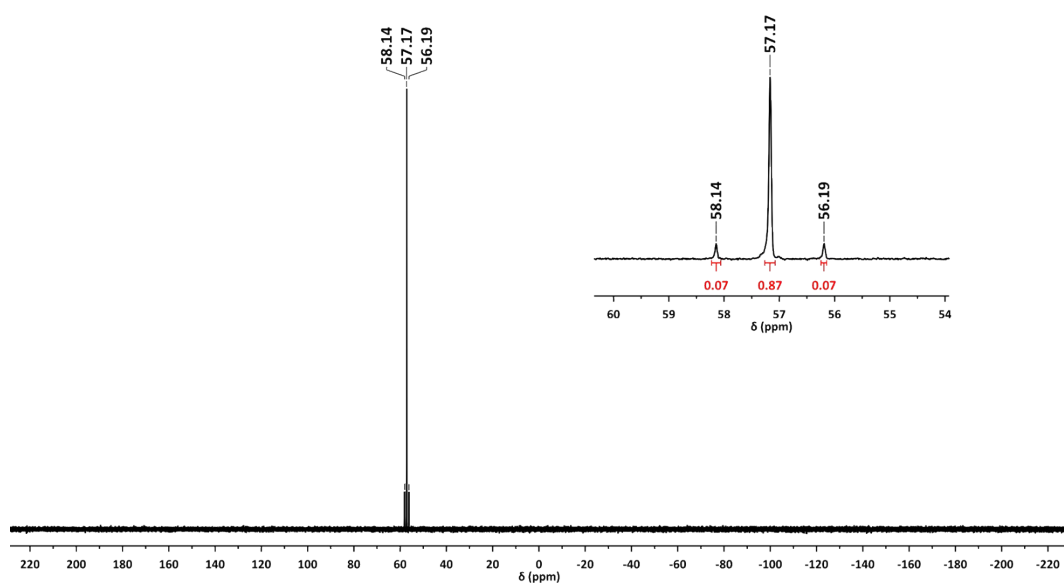

**Figure S11.**  $^{31}\text{P}$  NMR ( $\text{CD}_2\text{Cl}_2$ , 243 MHz) spectrum of  $[\text{Fc}_2\text{P}(\text{SePh})_2][\text{B}(\text{C}_6\text{F}_5)_4]$  (2).

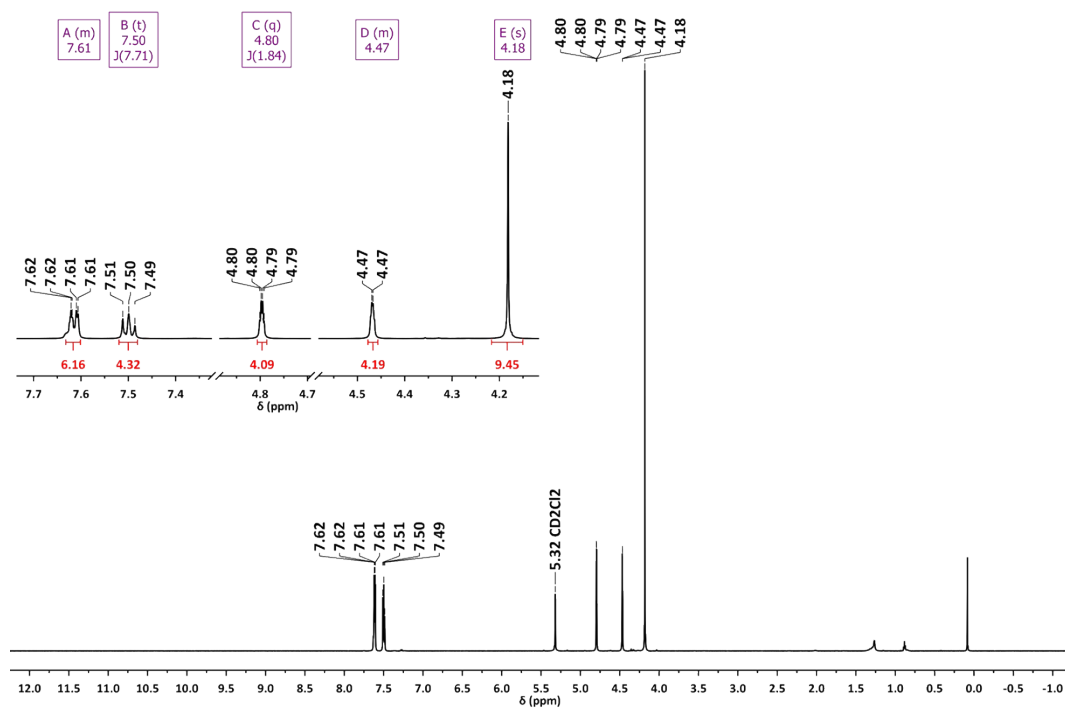

**Figure S12.**  $^1\text{H}$  NMR ( $\text{CD}_2\text{Cl}_2$ , 600 MHz) spectrum of  $[\text{Fc}_2\text{P}(\text{SePh})_2][\text{B}(\text{C}_6\text{F}_5)_4]$  (2).

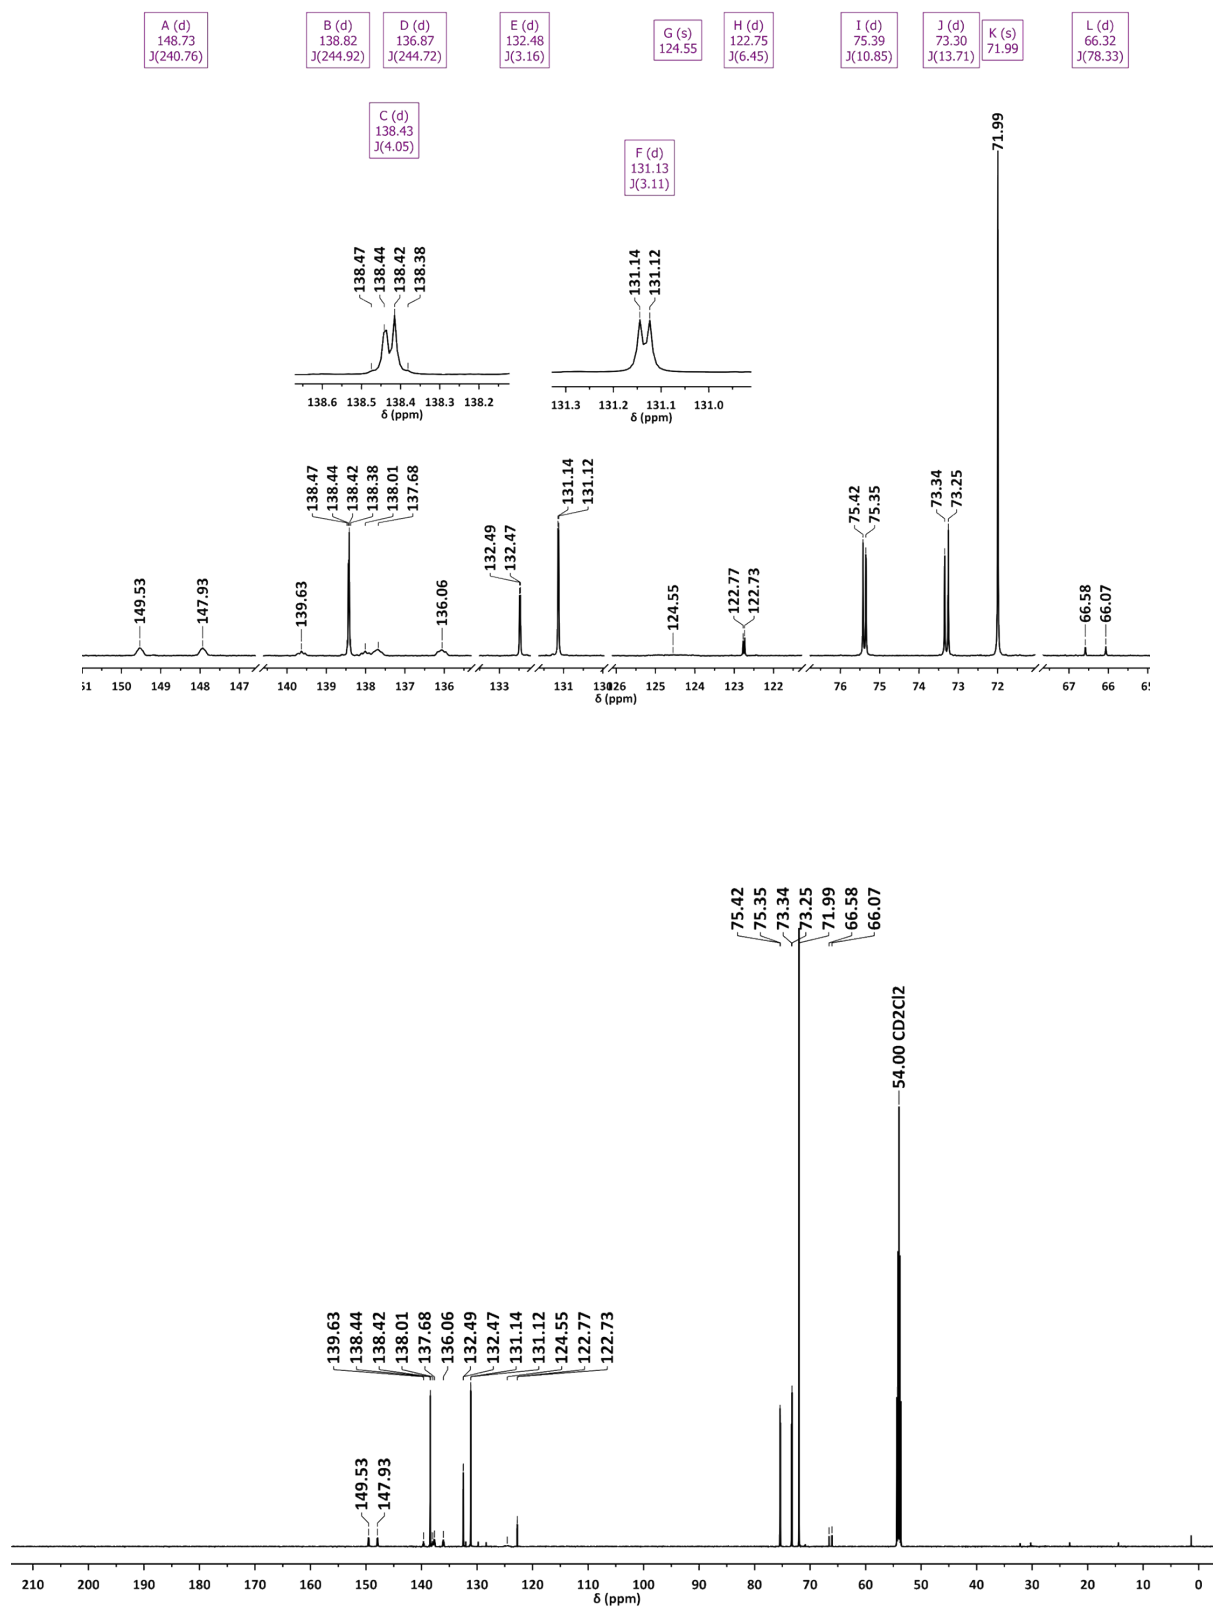

**Figure S13.**  $^{13}\text{C}\{^1\text{H}\}$  NMR ( $\text{CD}_2\text{Cl}_2$ , 151 MHz) spectra of  $[\text{Fc}_2\text{P}(\text{SePh})_2][\text{B}(\text{C}_6\text{F}_5)_4]$  (**2**).

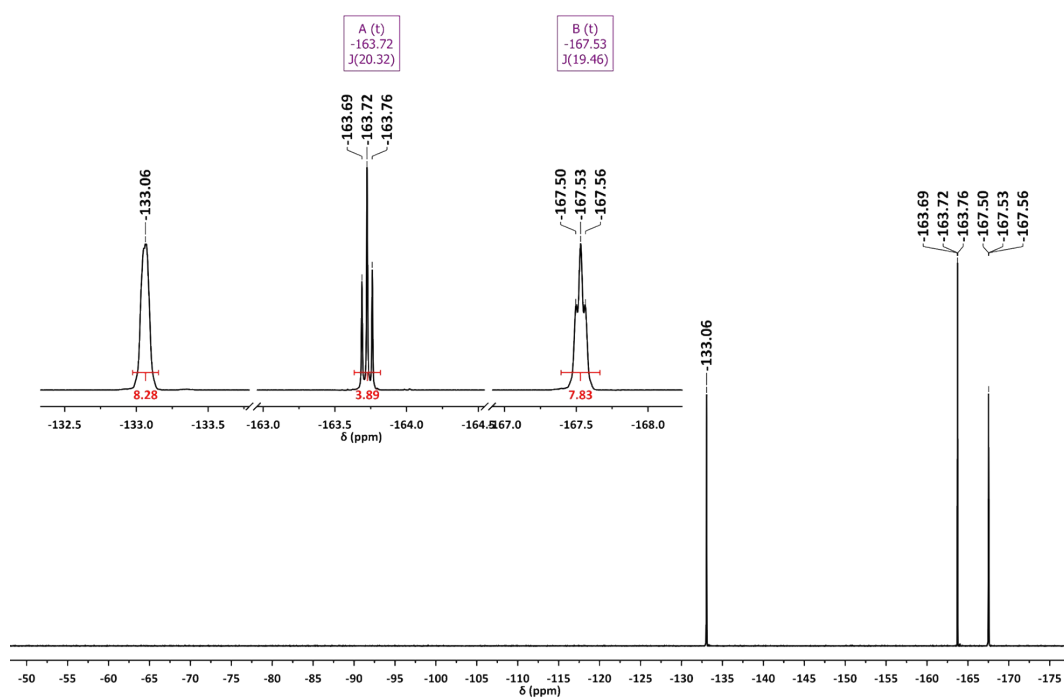

**Figure S14.**  $^{19}\text{F}$  NMR ( $\text{CD}_2\text{Cl}_2$ , 565 MHz) spectrum of  $[\text{Fc}_2\text{P}(\text{SePh})_2][\text{B}(\text{C}_6\text{F}_5)_4]$  (**2**).

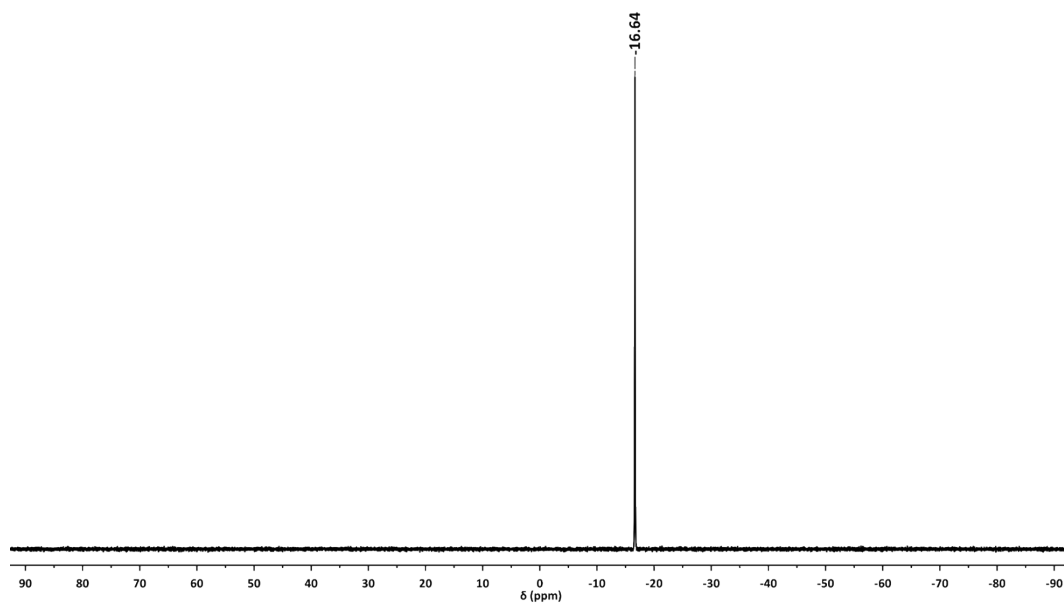

**Figure S15.**  $^{11}\text{B}$  NMR ( $\text{CD}_2\text{Cl}_2$ , 193 MHz) spectrum of  $[\text{Fc}_2\text{P}(\text{SePh})_2][\text{B}(\text{C}_6\text{F}_5)_4]$  (**2**).

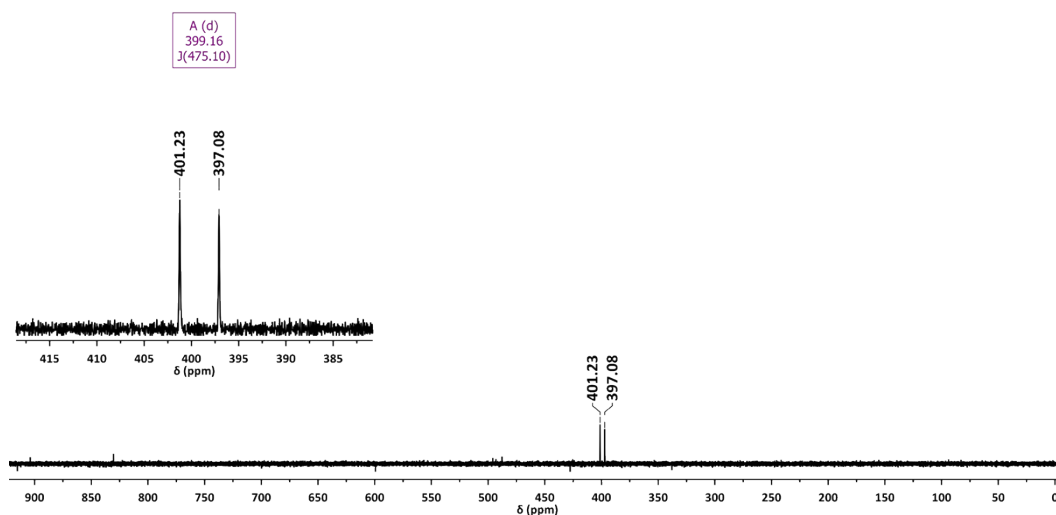

**Figure S16.**  $^{77}\text{Se}$  NMR ( $\text{CD}_2\text{Cl}_2$ , 114 MHz) spectrum of  $[\text{Fc}_2\text{P}(\text{SePh})_2][\text{B}(\text{C}_6\text{F}_5)_4]$  (2).

## 2.3 $[\text{Fc}_2\text{P}(\text{TePh})_2][\text{B}(\text{C}_6\text{F}_5)_4]$ (3)

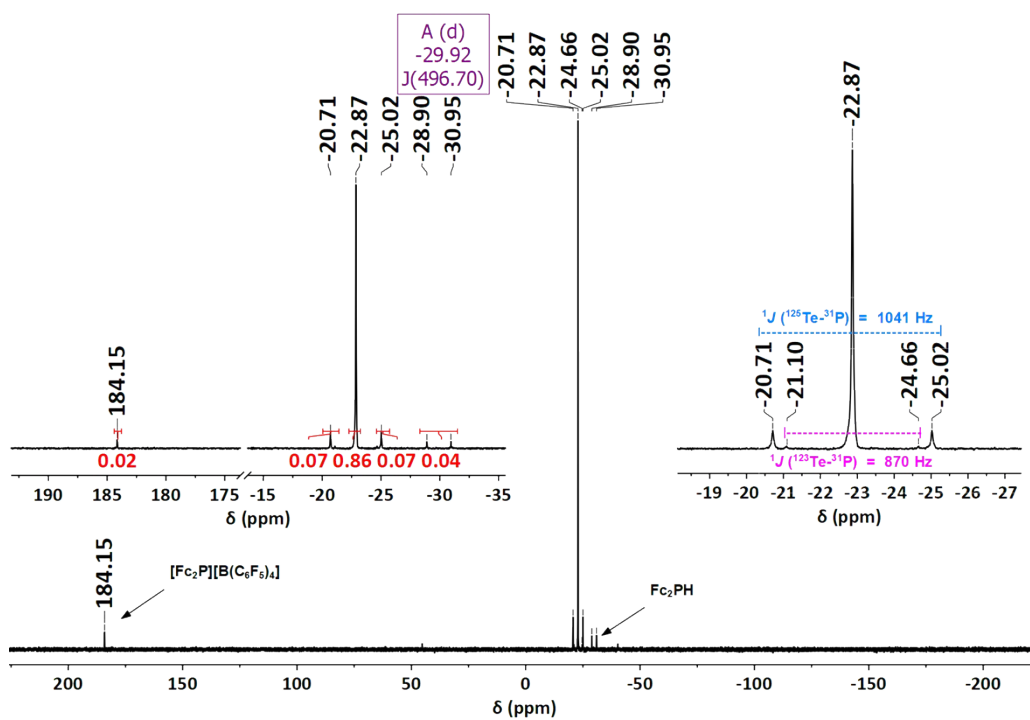

**Figure S17.**  $^{31}\text{P}$  NMR ( $\text{CD}_2\text{Cl}_2$ , 243 MHz) spectrum of  $[\text{Fc}_2\text{P}(\text{TePh})_2][\text{B}(\text{C}_6\text{F}_5)_4]$  (3).

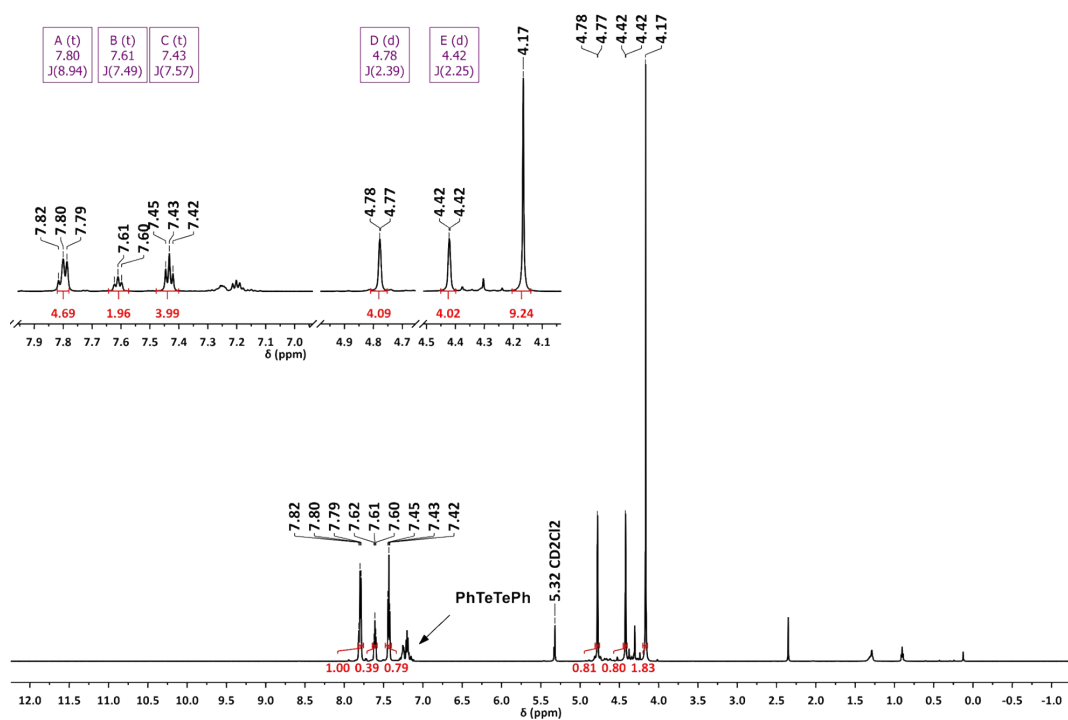

**Figure S18.**  $^1\text{H}$  NMR ( $\text{CD}_2\text{Cl}_2$ , 600 MHz) spectrum of  $[\text{Fc}_2\text{P}(\text{TePh})_2][\text{B}(\text{C}_6\text{F}_5)_4]$  (**3**).

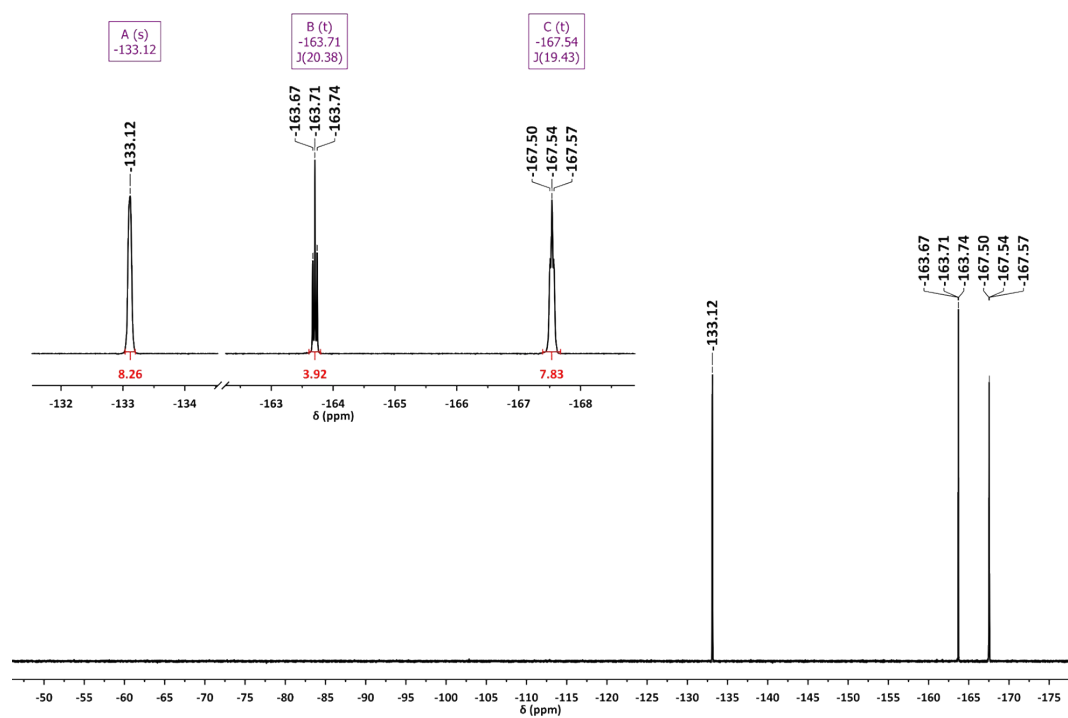

**Figure S19.**  $^{19}\text{F}$  NMR ( $\text{CD}_2\text{Cl}_2$ , 565 MHz) spectrum of  $[\text{Fc}_2\text{P}(\text{TePh})_2][\text{B}(\text{C}_6\text{F}_5)_4]$  (**3**).

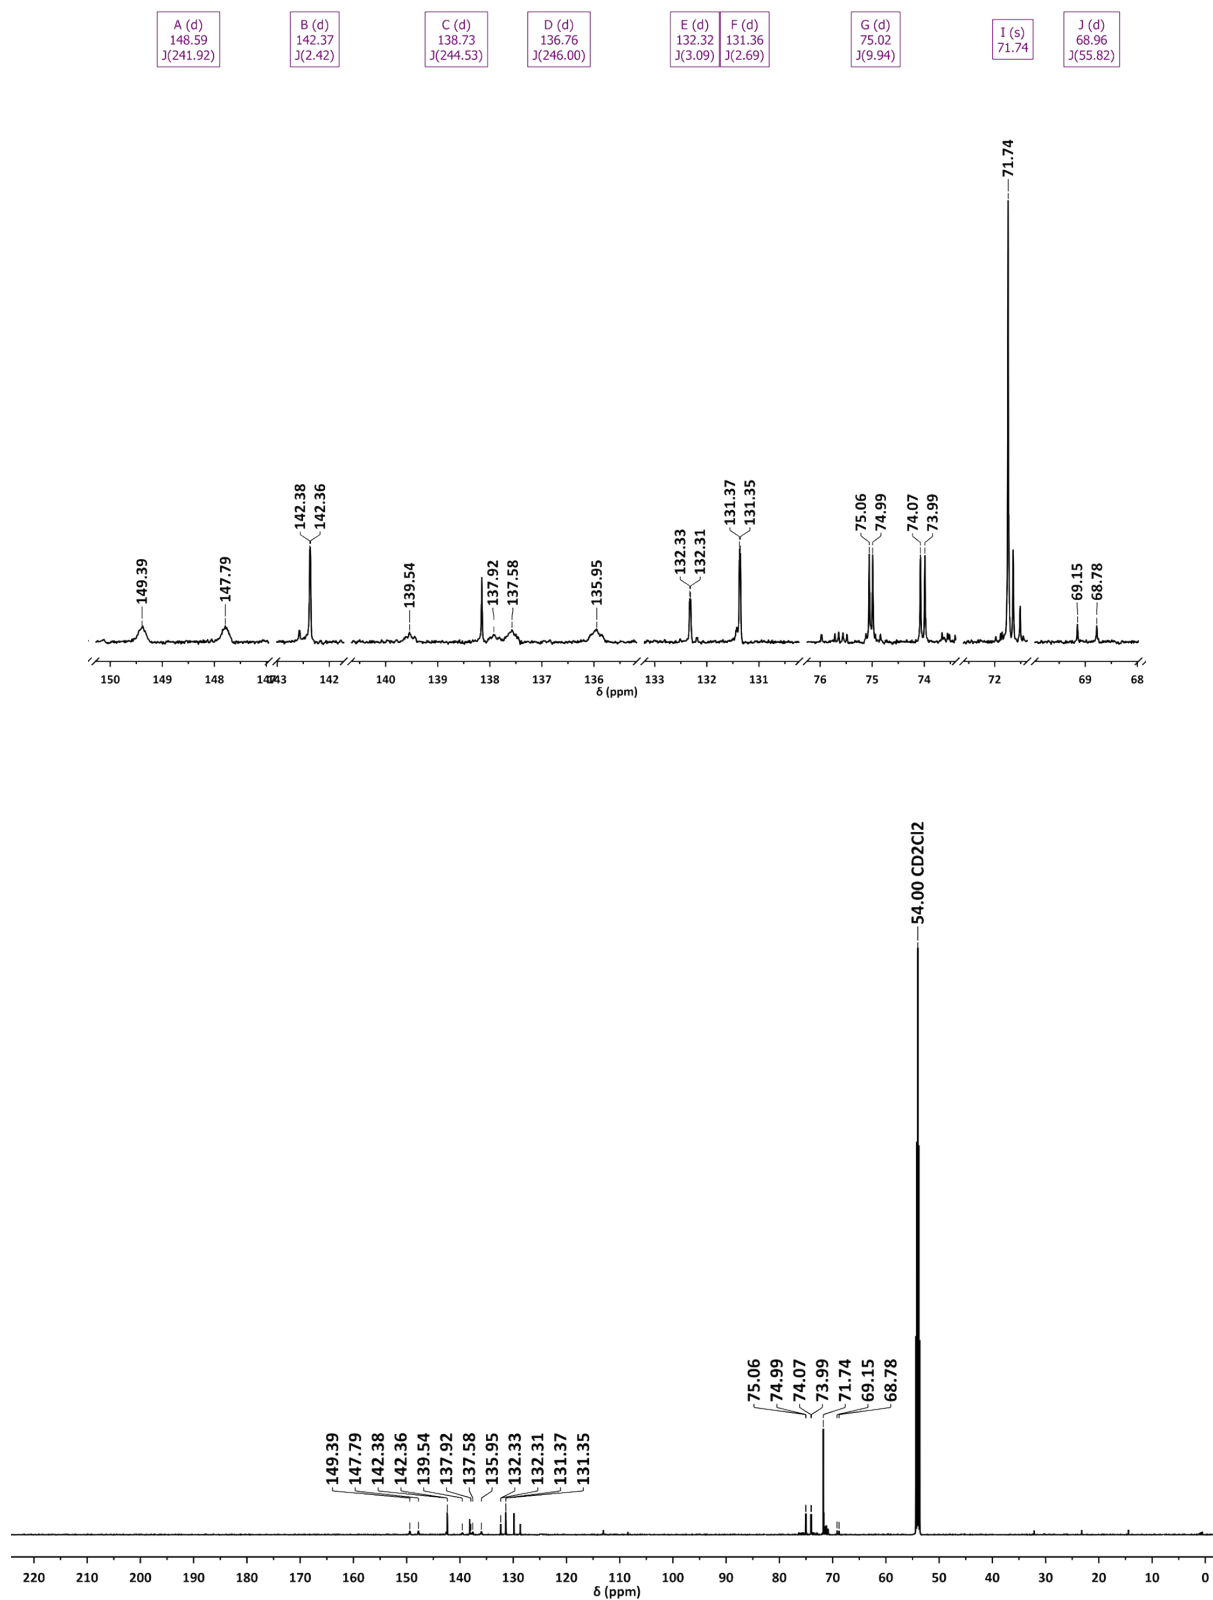

**Figure S20.**  $^{13}\text{C}$  NMR ( $\text{CD}_2\text{Cl}_2$ , 151 MHz) spectra of  $[\text{Fc}_2\text{P}(\text{TePh})_2][\text{B}(\text{C}_6\text{F}_5)_4]$  (**3**).

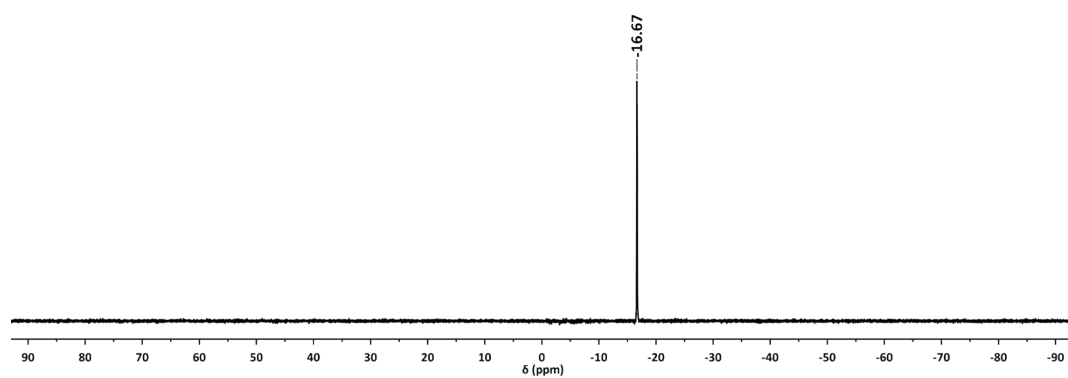

**Figure S21.**  $^{11}\text{B}$  NMR ( $\text{CD}_2\text{Cl}_2$ , 193 MHz) spectrum of  $[\text{Fc}_2\text{P}(\text{TePh})_2][\text{B}(\text{C}_6\text{F}_5)_4]$  (**3**).

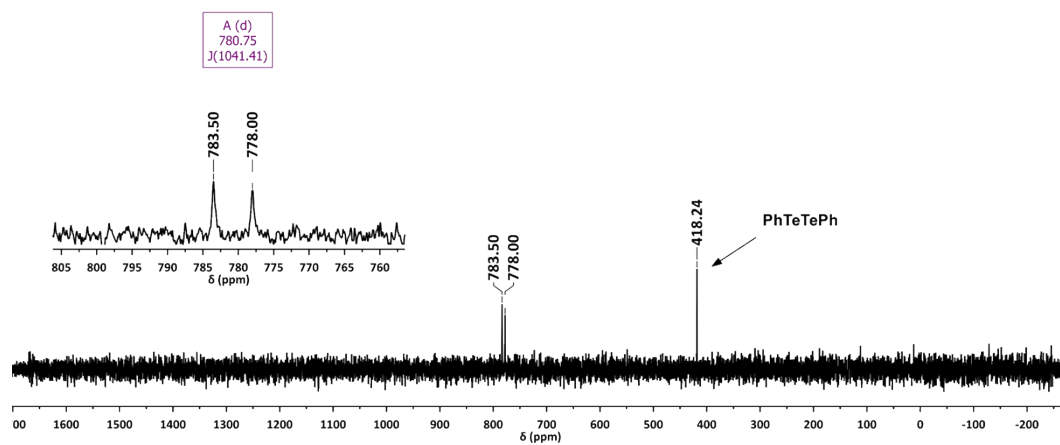

**Figure S22.**  $^{125}\text{Te}$  NMR ( $\text{CD}_2\text{Cl}_2$ , 189 MHz) spectrum of  $[\text{Fc}_2\text{P}(\text{TePh})_2][\text{B}(\text{C}_6\text{F}_5)_4]$  (**3**).

## 2.4 $[\text{Fc}_2\text{P}(\text{SeFc})_2][\text{B}(\text{C}_6\text{F}_5)_4]$ (**4**)

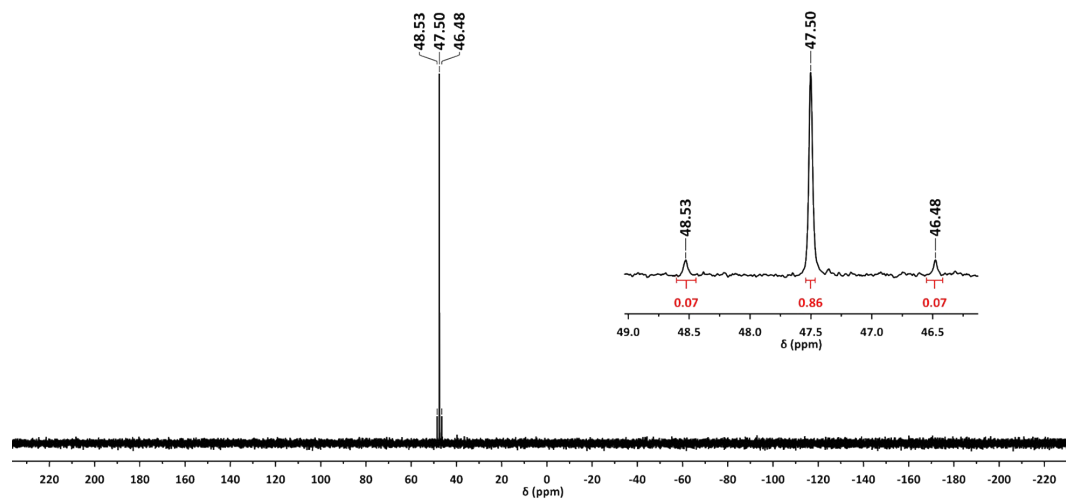

**Figure S23.**  $^{31}\text{P}$  NMR ( $\text{CD}_2\text{Cl}_2$ , 243 MHz) spectrum of  $[\text{Fc}_2\text{P}(\text{SeFc})_2][\text{B}(\text{C}_6\text{F}_5)_4]$  (**4**).

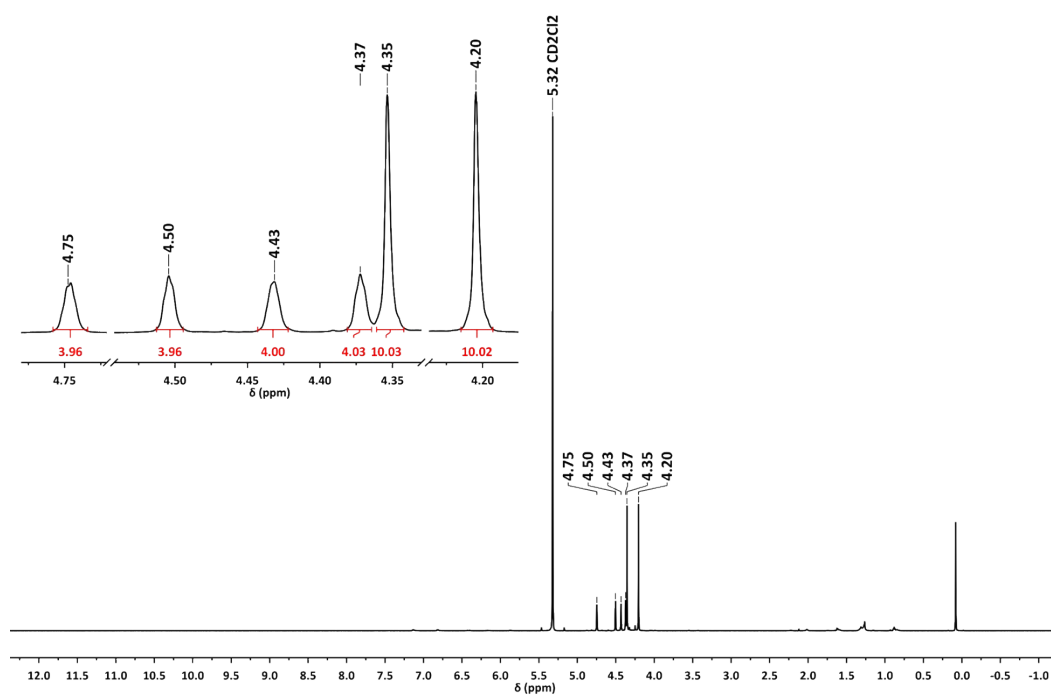

**Figure S24.**  $^1\text{H}$  NMR ( $\text{CD}_2\text{Cl}_2$ , 600 MHz) spectrum of  $[\text{Fc}_2\text{P}(\text{SeFc})_2][\text{B}(\text{C}_6\text{F}_5)_4]$  (**4**).

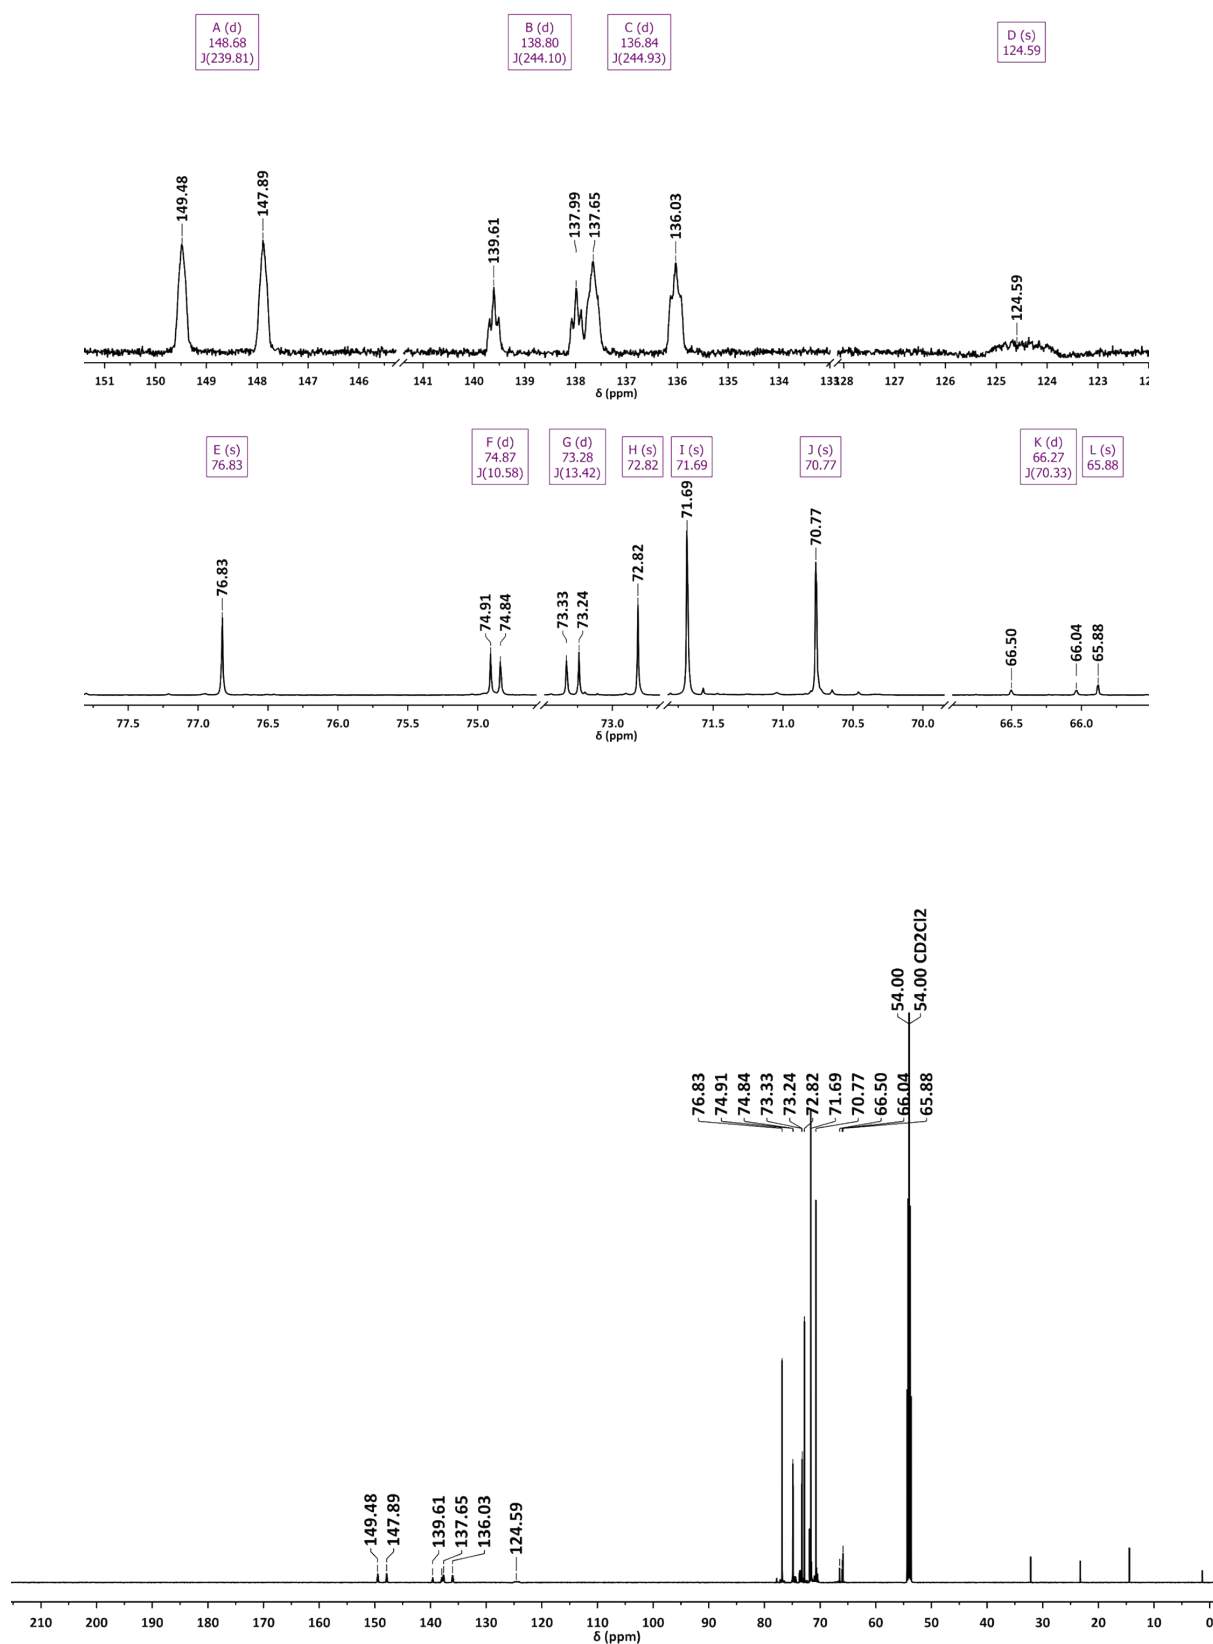

**Figure S25.**  $^{13}\text{C}$  NMR ( $\text{CD}_2\text{Cl}_2$ , 151 MHz) spectra of  $[\text{Fc}_2\text{P}(\text{SeFc})_2][\text{B}(\text{C}_6\text{F}_5)_4]$  (**4**).

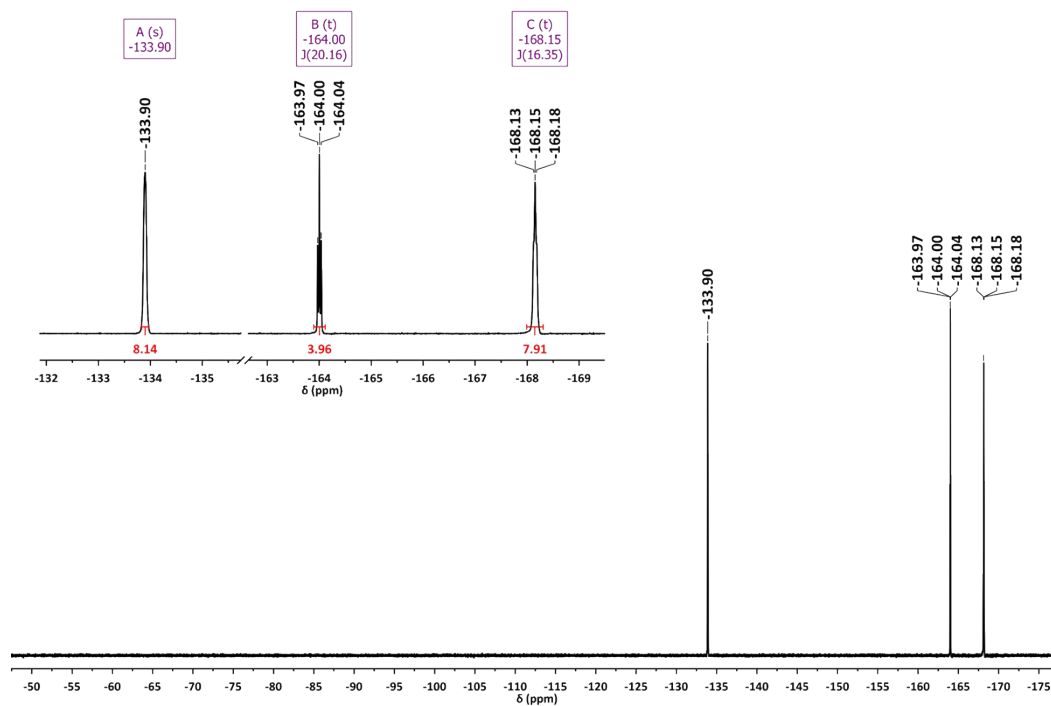

**Figure S26.**  $^{19}\text{F}$  NMR ( $\text{CD}_2\text{Cl}_2$ , 565 MHz) spectrum of  $[\text{Fc}_2\text{P}(\text{SeFc})_2][\text{B}(\text{C}_6\text{F}_5)_4]$  (**4**).

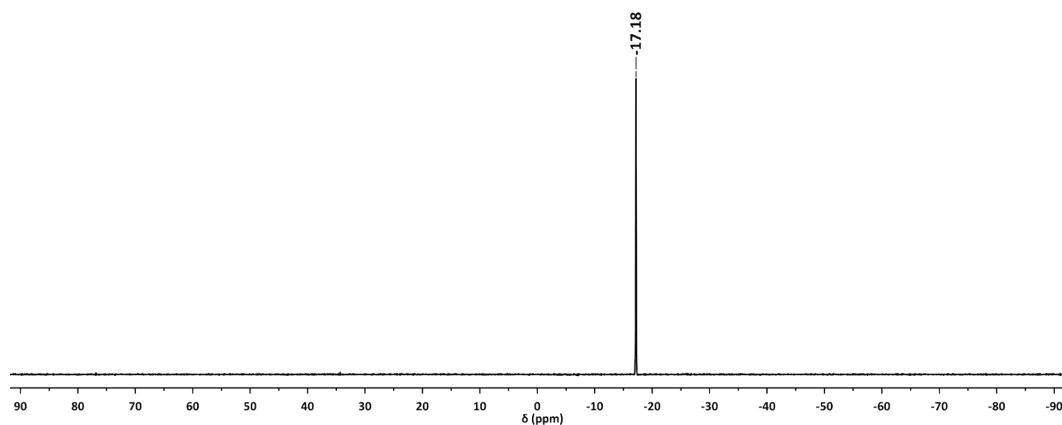

**Figure S27.**  $^{11}\text{B}$  NMR ( $\text{CD}_2\text{Cl}_2$ , 193 MHz) spectrum of  $[\text{Fc}_2\text{P}(\text{SeFc})_2][\text{B}(\text{C}_6\text{F}_5)_4]$  (**4**).

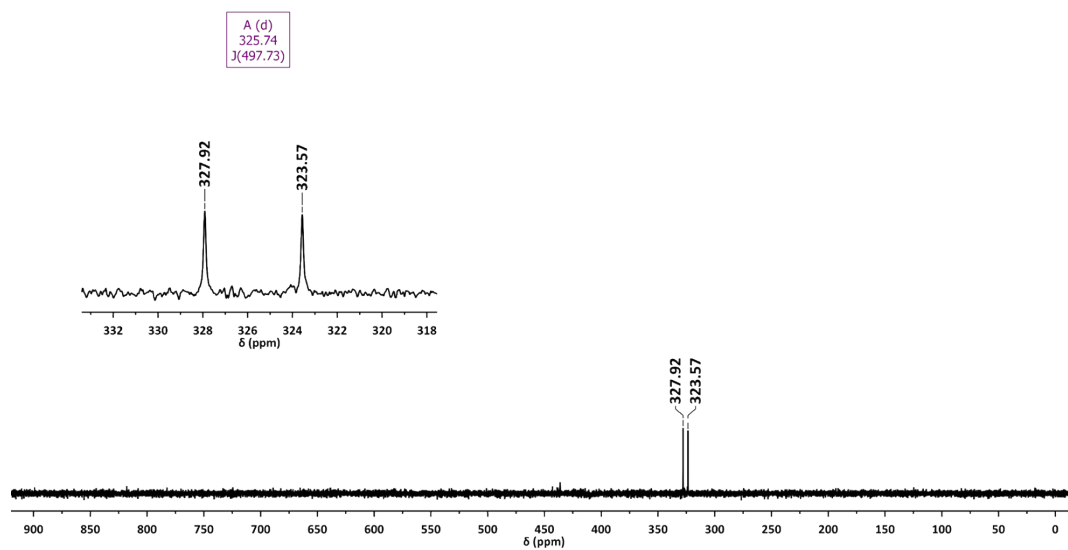

**Figure S28.**  $^{77}\text{Se}$  NMR ( $\text{CD}_2\text{Cl}_2$ , 114 MHz) spectrum of  $[\text{Fc}_2\text{P}(\text{SeFc})_2][\text{B}(\text{C}_6\text{F}_5)_4]$  (4).

## 2.5 $[\text{Fc}_2\text{P}(\text{Se}_2\text{biphen})][\text{B}(\text{C}_6\text{F}_5)_4]$ (5)

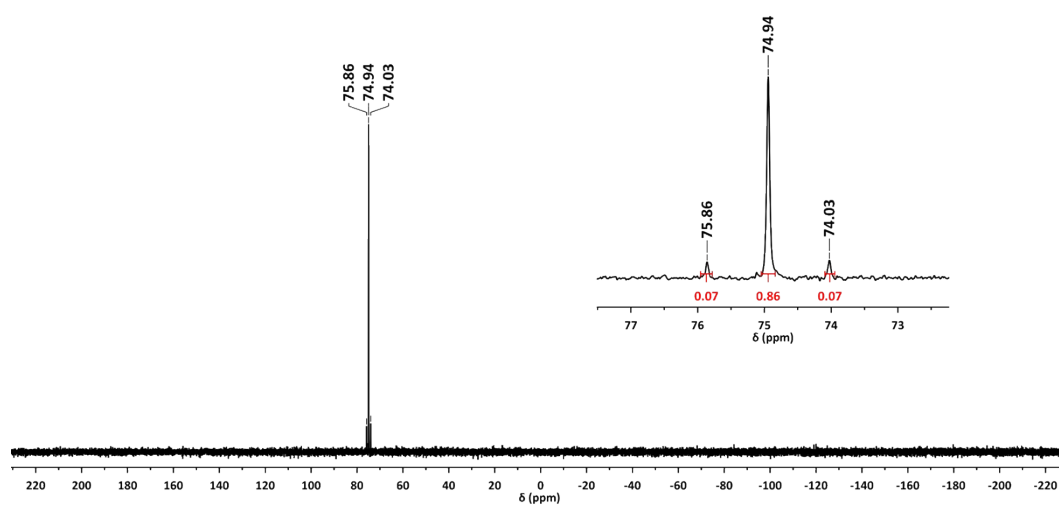

**Figure S29.**  $^{31}\text{P}$  NMR ( $\text{CD}_2\text{Cl}_2$ , 243 MHz) spectrum of  $[\text{Fc}_2\text{P}(\text{Se}_2\text{biphen})][\text{B}(\text{C}_6\text{F}_5)_4]$  (5).

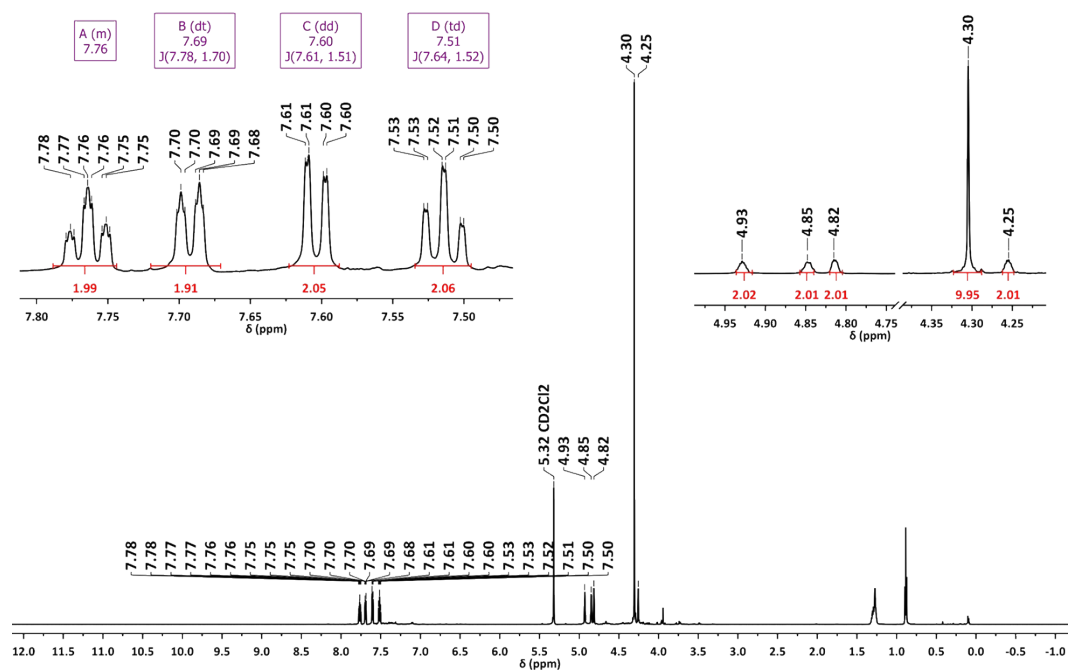

**Figure S30.** <sup>1</sup>H NMR (CD<sub>2</sub>Cl<sub>2</sub>, 600 MHz) spectrum of [Fc<sub>2</sub>P(Se<sub>2</sub>biphen)][B(C<sub>6</sub>F<sub>5</sub>)<sub>4</sub>] (**5**).

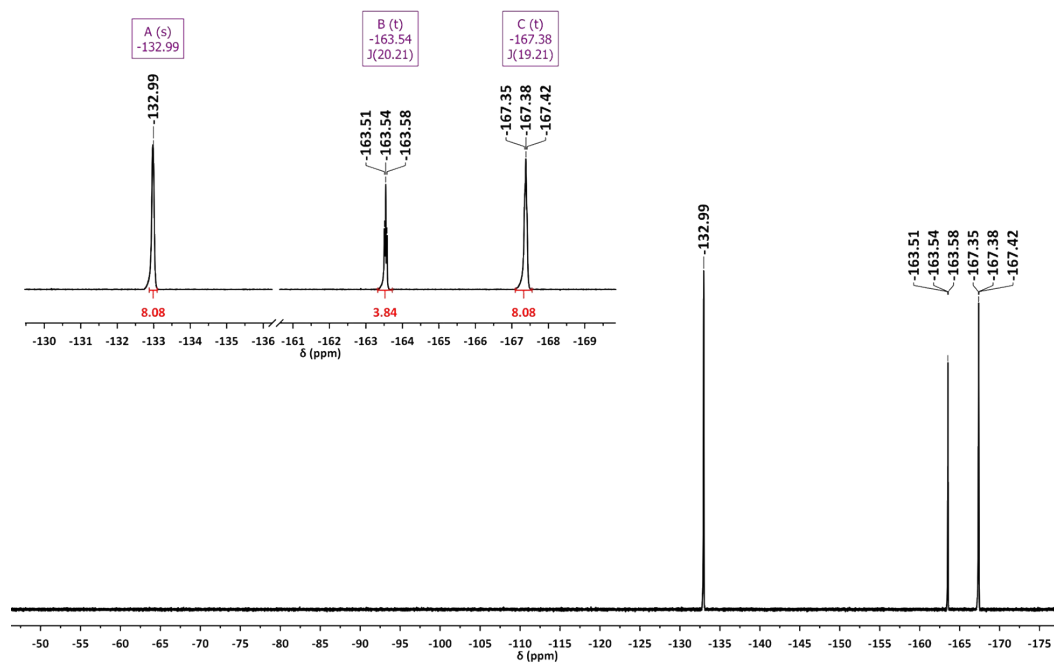

**Figure S31.** <sup>19</sup>F NMR (CD<sub>2</sub>Cl<sub>2</sub>, 565 MHz) spectrum of [Fc<sub>2</sub>P(Se<sub>2</sub>biphen)][B(C<sub>6</sub>F<sub>5</sub>)<sub>4</sub>] (**5**).

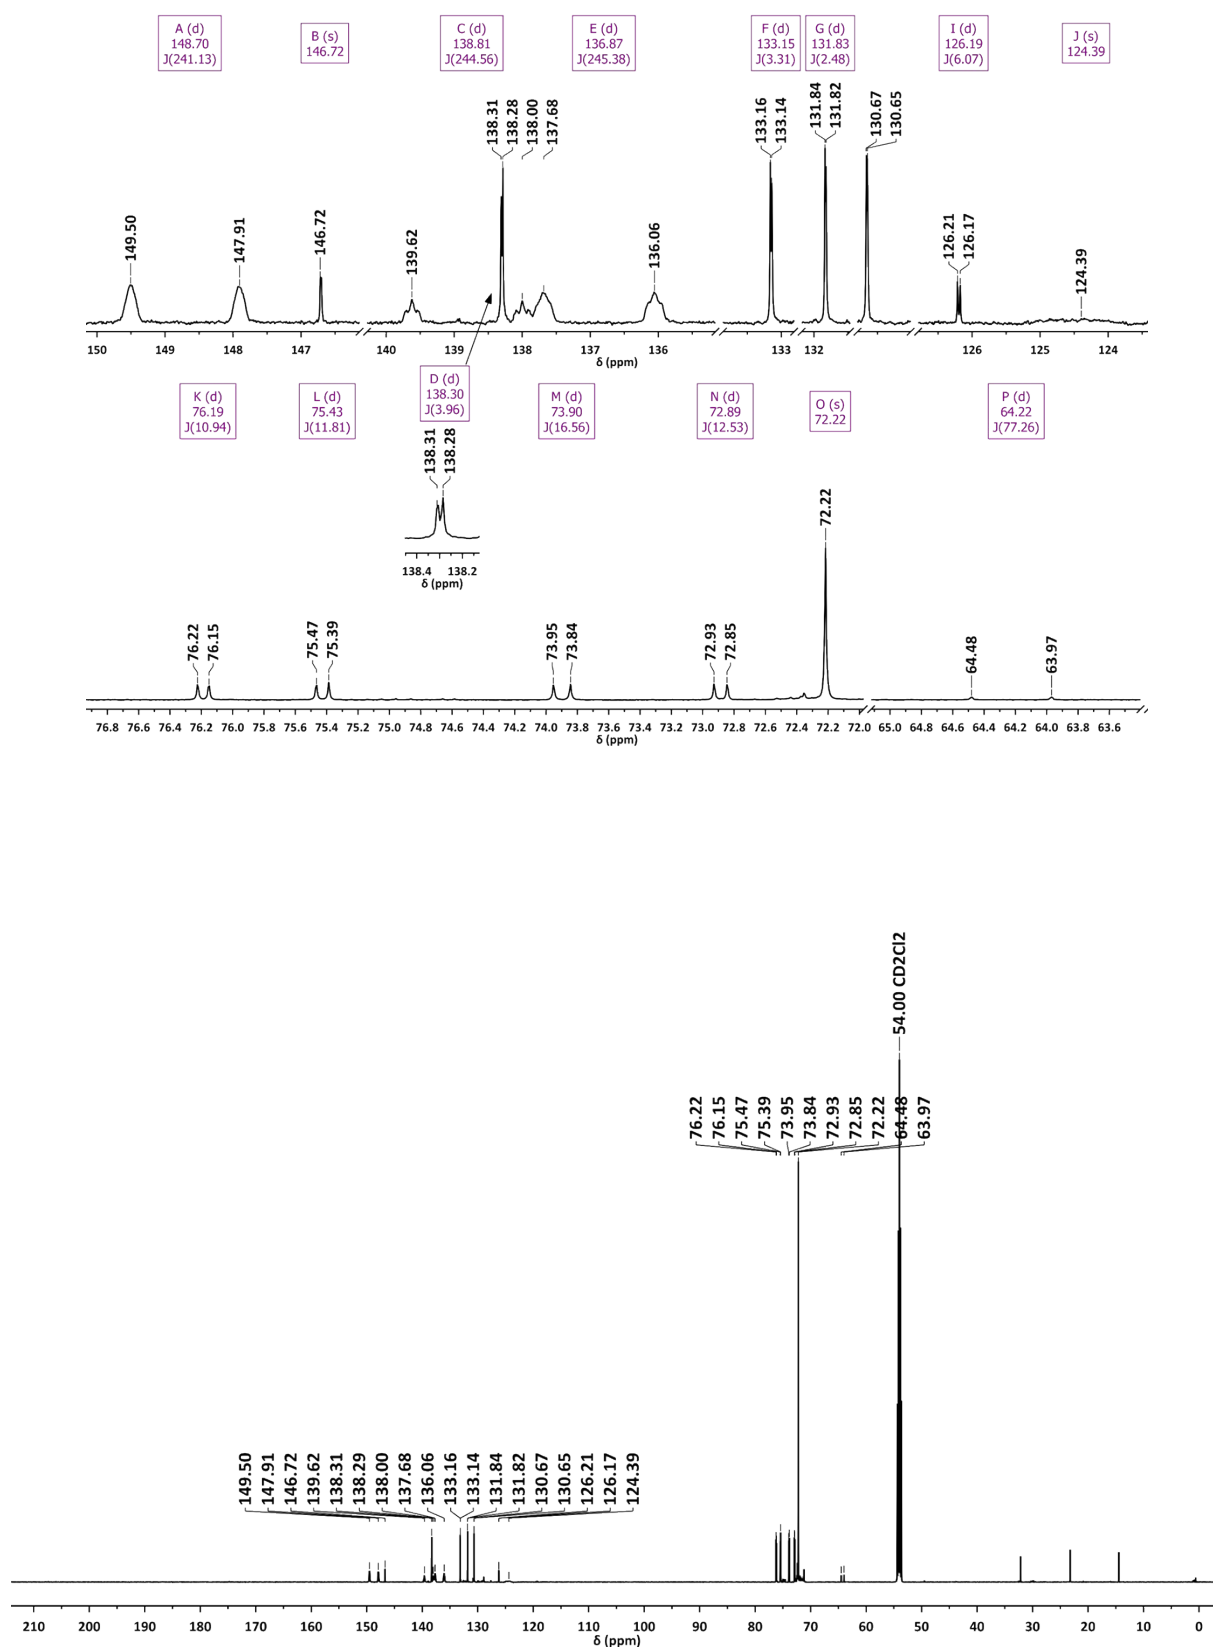

**Figure S32.**  $^{13}\text{C}$  NMR ( $\text{CD}_2\text{Cl}_2$ , 151 MHz) spectra of  $[\text{Fc}_2\text{P}(\text{Se}_2\text{biphen})][\text{B}(\text{C}_6\text{F}_5)_4]$  (**5**).

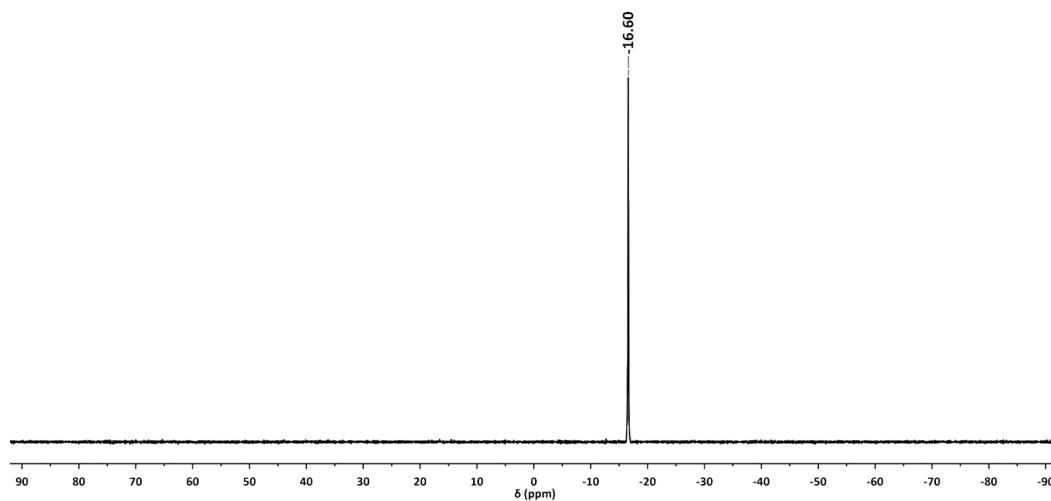

**Figure S33.**  $^{11}\text{B}$  NMR (CD $_2$ Cl $_2$ , 193 MHz) spectrum of  $[\text{Fc}_2\text{P}(\text{Se}_2\text{biphen})][\text{B}(\text{C}_6\text{F}_5)_4]$  (5).

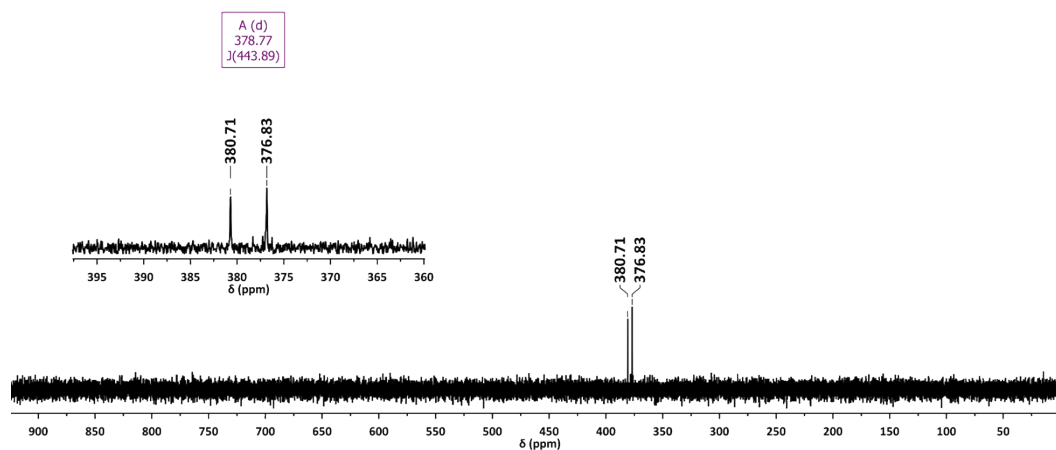

**Figure S34.**  $^{77}\text{Se}$  NMR (CD $_2$ Cl $_2$ , 114 MHz) spectrum of  $[\text{Fc}_2\text{P}(\text{Se}_2\text{biphen})][\text{B}(\text{C}_6\text{F}_5)_4]$  (5).

### 3 Michael addition

#### 3.1 General Procedure

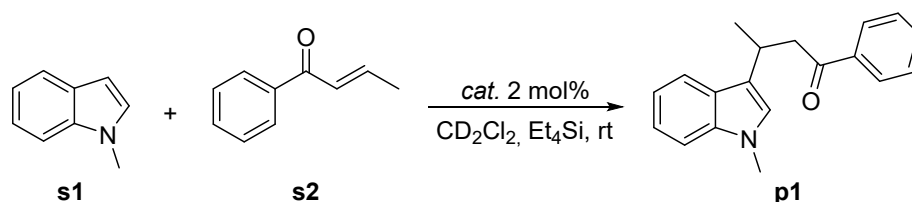

All experiments were carried on under inert conditions in a J. Young NMR tube and followed by NMR. The corresponding catalyst (compounds **1–5** or the  $[\text{Fc}_2\text{P}][\text{B}(\text{C}_6\text{F}_5)_4]$  40  $\mu\text{L}$ , 0.6  $\mu\text{mol}$ , 15 mM stock solution in  $\text{CD}_2\text{Cl}_2$ , 2 mol%) was added into the NMR-tube together with  $\text{CD}_2\text{Cl}_2$  (100  $\mu\text{L}$ ). Then, it was followed by the addition of a 150 mM stock solution of *trans*- $\beta$ -crotonophenone (**s2**, 200  $\mu\text{L}$ , 30  $\mu\text{mol}$ , 1.0 equiv., incl. 0.25 eq.  $\text{Et}_4\text{Si}$ ) and a 150 mM stock solution of 1-methylindole (**s1**, 200  $\mu\text{L}$ , 30  $\mu\text{mol}$ , 1.0 equiv.), both in  $\text{CD}_2\text{Cl}_2$ . The tube was sealed, shaken and placed in an ultrasonic bath. After 30, 60 and 120 min of sonication,  $^1\text{H}$  NMR measurements were conducted (4 scans,  $d_1 = 30$  s, suitable for integration, assuming an error margin of 5%). The yields were determined by integration of the characteristic signal of product **p1** at 3.24 ppm (dd,  $J = 16, 8$  Hz, 1H) and at 3.45 ppm (dd,  $J = 16, 5$  Hz, 1H). The integral of the ethyl peak of  $\text{Et}_4\text{Si}$  (0.52 ppm, q,  $J = 8$  Hz) was calibrated to 2 and/or the integral of the methyl peak of  $\text{Et}_4\text{Si}$  (0.94 ppm, t,  $J = 8$  Hz) was calibrated to 3 against the starting material **s2**. Additionally, the consumption of the  $-\text{CH}_3$  signal of **s2** at 2.00 ppm (dd,  $J = 7, 2$  Hz, 3H) can be followed, together with the formation of the product **p1** with the characteristic  $-\text{CH}_3$  signal at 1.42 ppm (d,  $J = 7$  Hz, 3H).

**Table S1.** Catalytic screening of the Michael addition.

| <i>Catalyst</i><br><i>(2 mol%)</i>                                  | <i>Conversion (yield)</i><br><i>30 min</i> | <i>Conversion (yield)</i><br><i>60 min</i> | <i>Conversion (yield)</i><br><i>120 min</i> |
|---------------------------------------------------------------------|--------------------------------------------|--------------------------------------------|---------------------------------------------|
| <b>1</b>                                                            | 22 (10)                                    | 27 (16)                                    | 34 (22)                                     |
| <b>2</b>                                                            | 19 (10)                                    | 24 (12)                                    | 50 (38)                                     |
| <b>3</b>                                                            | 61 (50)                                    | 79 (68)                                    | 86 (74)                                     |
| <b>4</b>                                                            | 74 (62)                                    | 87 (78)                                    | 93 (86)                                     |
| <b>5</b>                                                            | 50 (36)                                    | 70 (56)                                    | 90 (78)                                     |
| <i>[Fc<sub>2</sub>P][B(C<sub>6</sub>F<sub>5</sub>)<sub>4</sub>]</i> | 100 (90)                                   | -                                          | -                                           |

Conversions and yields in %, as determined by <sup>1</sup>H-NMR (d1 = 30 s) using tetraethylsilane as internal standard.

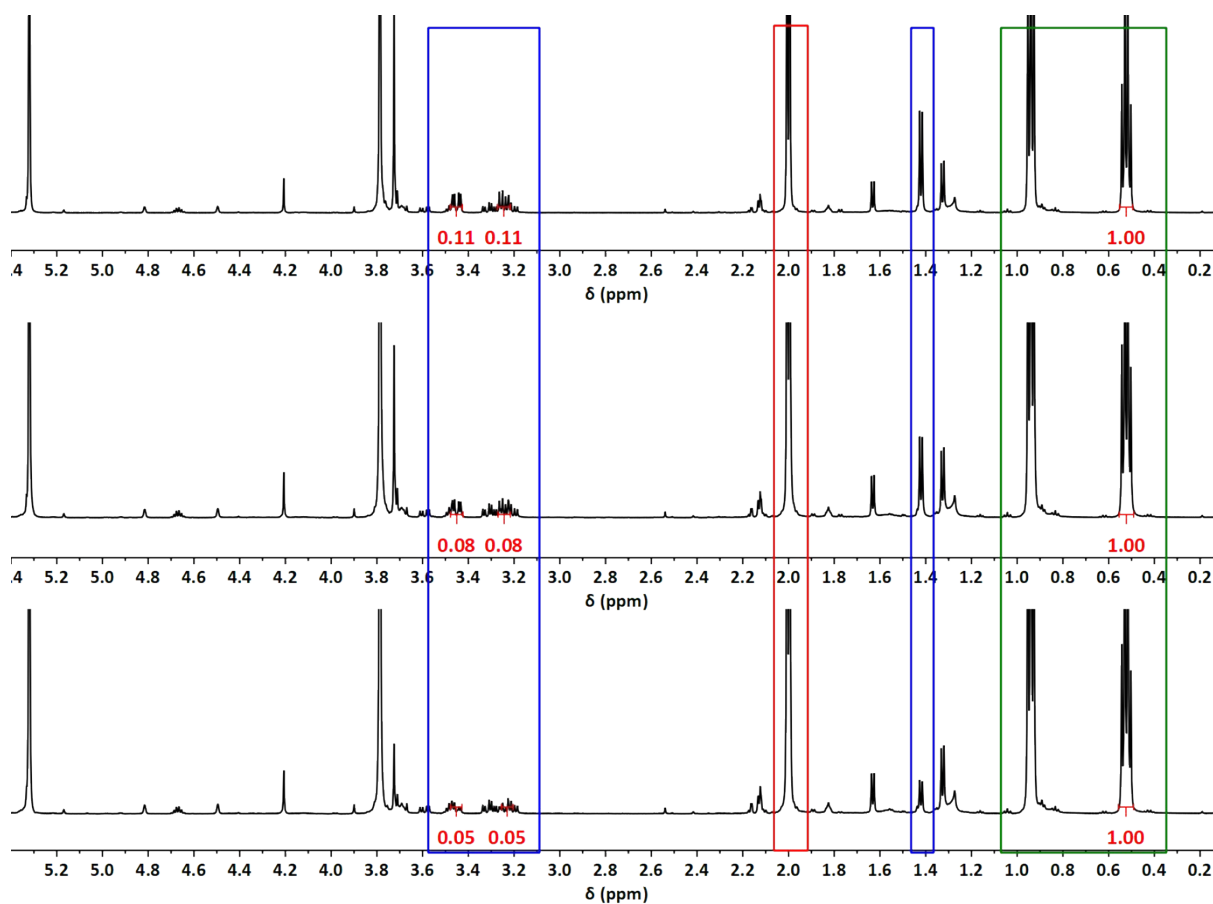

**Figure S35.**  $^1\text{H}$  NMR ( $\text{CD}_2\text{Cl}_2$ , 600 MHz) spectra of the Michael addition using compound **1** as catalyst. Bottom to top: 30 min, 60 min and 120 min of sonication respectively. Important signals are marked as follows: blue for the newly formed product **p1**, red for **s2**, and green for  $\text{Et}_4\text{Si}$ .

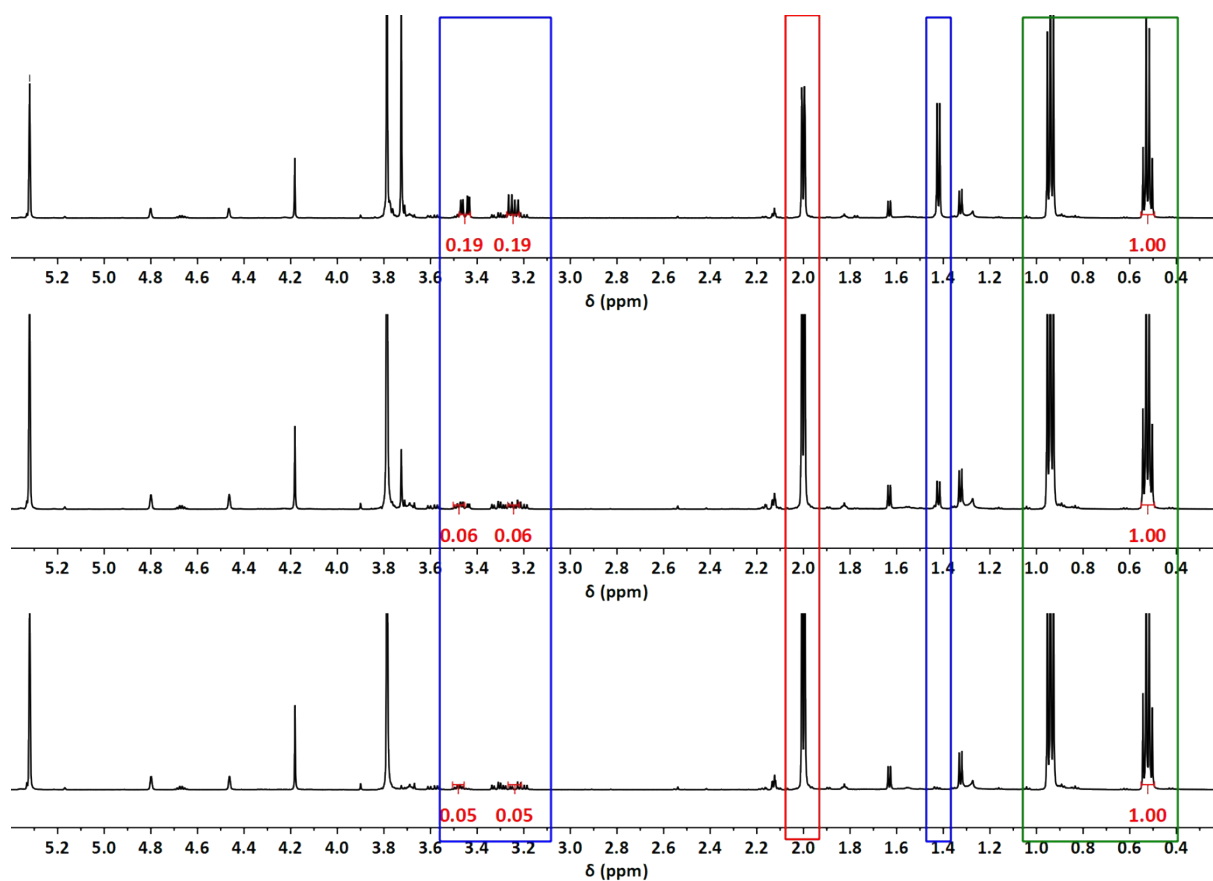

**Figure S36.**  $^1\text{H}$  NMR ( $\text{CD}_2\text{Cl}_2$ , 600 MHz) spectra of the Michael addition using compound **2** as catalyst. Bottom to top: 30 min, 60 min and 120 min of sonication respectively. Important signals are marked as follows: blue for the newly formed product **p1**, red for **s2**, and green for  $\text{Et}_4\text{Si}$ . Full conversion (90% yield) after approximately 6 h of sonication.

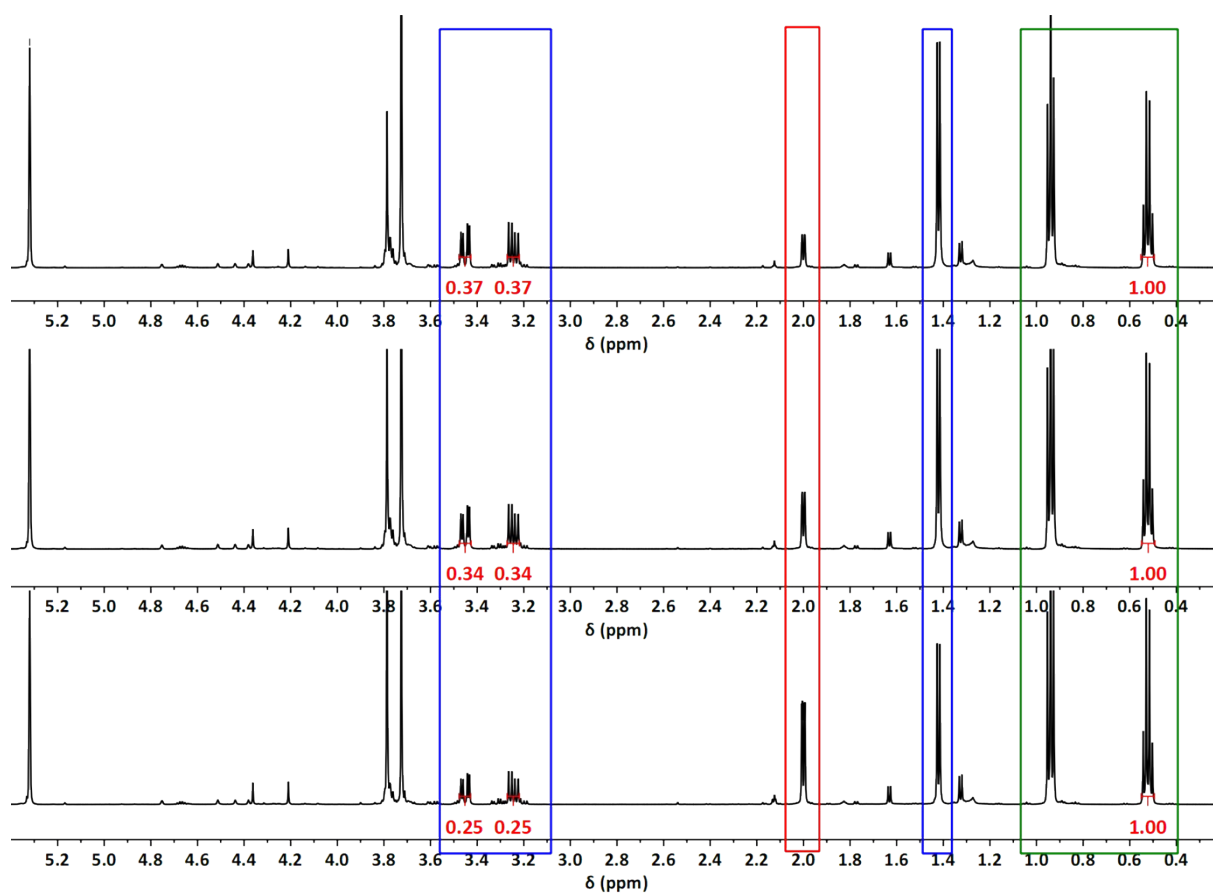

**Figure S37.**  $^1\text{H}$  NMR ( $\text{CD}_2\text{Cl}_2$ , 600 MHz) spectra of the Michael addition using compound **3** as catalyst. Bottom to top: 30 min, 60 min and 120 min of sonication respectively. Important signals are marked as follows: blue for the newly formed product **p1**, red for **s2**, and green for  $\text{Et}_4\text{Si}$ . Full conversion (90% yield) after approximately 3 h of sonication.

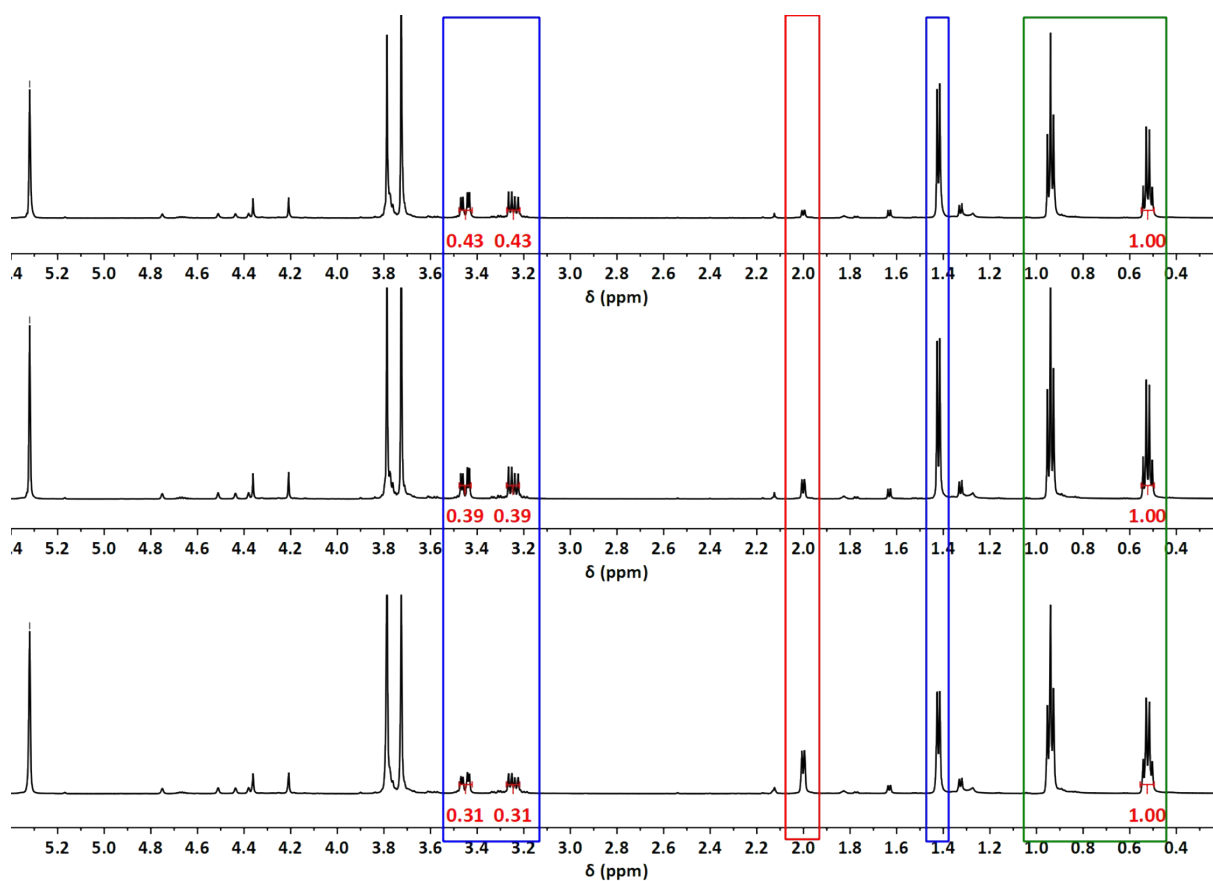

**Figure S38.**  $^1\text{H}$  NMR ( $\text{CD}_2\text{Cl}_2$ , 600 MHz) spectra of the Michael addition using compound **4** as catalyst. Bottom to top: 30 min, 60 min and 120 min of sonication respectively. Important signals are marked as follows: blue for the newly formed product **p1**, red for **s2**, and green for  $\text{Et}_4\text{Si}$ . Full conversion (90% yield) after approximately 2.5 h of sonication.

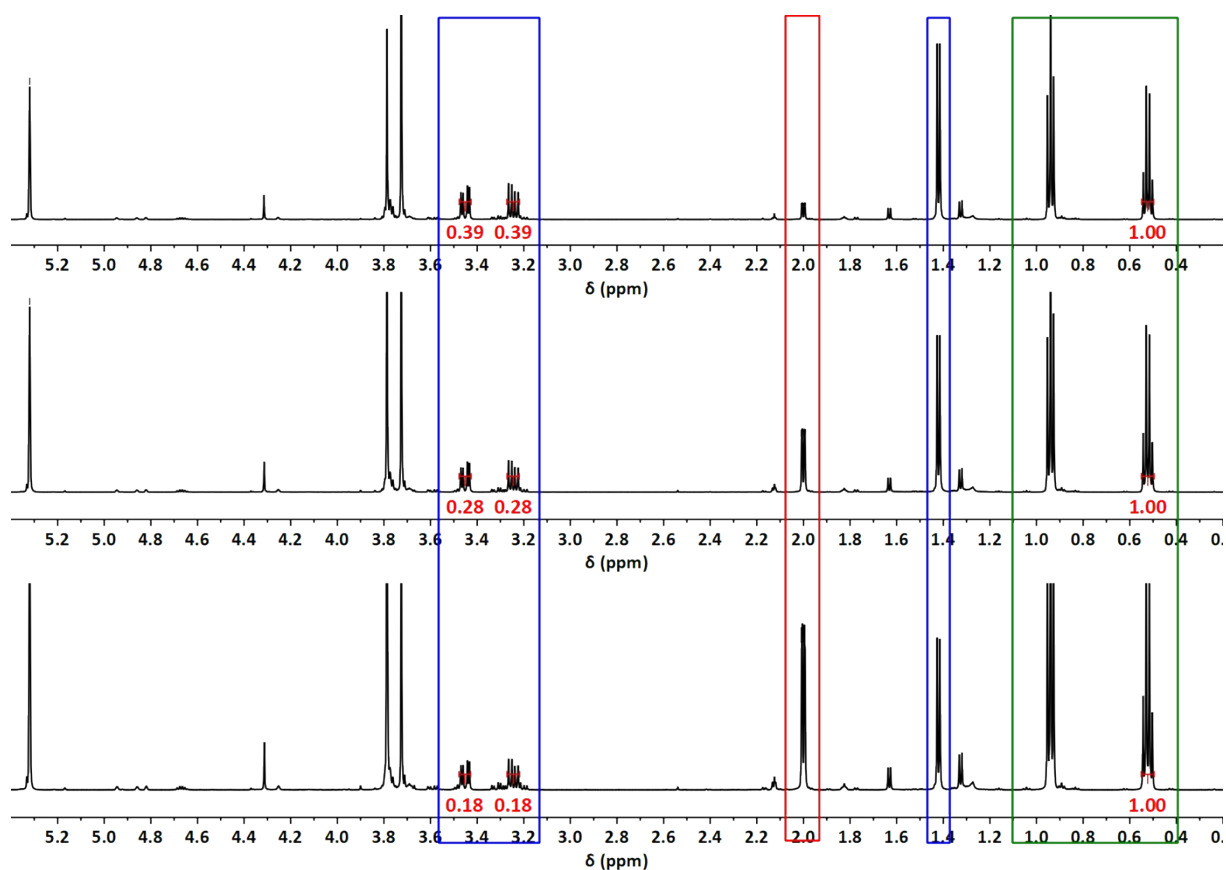

**Figure S38.**  $^1\text{H}$  NMR ( $\text{CD}_2\text{Cl}_2$ , 600 MHz) spectra of the Michael addition using compound **5** as catalyst. Bottom to top: 30 min, 60 min and 120 min of sonication respectively. Important signals are marked as follows: blue for the newly formed product **p1**, red for **s2**, and green for  $\text{Et}_4\text{Si}$ . Full conversion (90% yield) after approximately 4 h of sonication.

## 4 Crystallographic Data

Intensity data of **1–5** was collected on a Bruker Venture D8 diffractometer at 100 K with graphite-monochromatic Mo-K $\alpha$  (0.7107 Å) radiation. All structures were solved by direct methods and refined based on  $F^2$  by use of the SHELX program package as implemented in WinGX<sup>S6,S7</sup> or OLEX2.<sup>S8</sup> All non-hydrogen atoms were refined using anisotropic displacement parameters. Hydrogen atoms attached to carbon atoms were included in geometrically calculated positions using a riding model. Crystal and refinement data are collected in Supplementary Tables S2 – S4. Figures were created using Diamond.<sup>S9</sup> Crystallographic data for the structural analyses have been deposited with the Cambridge Crystallographic Data Centre. Copies of this information may be obtained free of charge from The Director, CCDC, 12 Union Road, Cambridge CB2 1EZ, UK (Fax: +44-1223-336033; e-mail: deposit@ccdc.cam.ac.uk or <http://www.ccdc.cam.ac.uk>).

**Table S2.** Crystal data and structure refinement of compounds **1** and **2**.

|                                                                 | <b>1</b>                                                                         | <b>2</b>                                                                          |
|-----------------------------------------------------------------|----------------------------------------------------------------------------------|-----------------------------------------------------------------------------------|
| Formula                                                         | C <sub>56</sub> H <sub>28</sub> BF <sub>20</sub> Fe <sub>2</sub> PS <sub>2</sub> | C <sub>56</sub> H <sub>28</sub> BF <sub>20</sub> Fe <sub>2</sub> PSe <sub>2</sub> |
| Formula weight, g mol <sup>-1</sup>                             | 1298.38                                                                          | 1392.18                                                                           |
| Crystal system                                                  | monoclinic                                                                       | monoclinic                                                                        |
| Crystal size, mm                                                | 0.40 × 0.30 × 0.10                                                               | 0.40 × 0.40 × 0.40                                                                |
| Space group                                                     | C2/c                                                                             | C2/c                                                                              |
| <i>a</i> , Å                                                    | 16.270(2)                                                                        | 16.240(2)                                                                         |
| <i>b</i> , Å                                                    | 16.235(2)                                                                        | 16.332(2)                                                                         |
| <i>c</i> , Å                                                    | 38.130(5)                                                                        | 38.510(5)                                                                         |
| $\alpha$ , °                                                    | 90                                                                               | 90                                                                                |
| $\beta$ , °                                                     | 98.979(6)                                                                        | 98.942(4)                                                                         |
| $\gamma$ , °                                                    | 90                                                                               | 90                                                                                |
| <i>V</i> , Å <sup>3</sup>                                       | 9949(2)                                                                          | 10090(2)                                                                          |
| <i>Z</i>                                                        | 8                                                                                | 8                                                                                 |
| $\rho_{\text{calcd}}$ , Mg m <sup>-3</sup>                      | 1.734                                                                            | 1.833                                                                             |
| $\mu$ (Mo <i>K</i> α), mm <sup>-1</sup>                         | 0.816                                                                            | 2.165                                                                             |
| <i>F</i> (000)                                                  | 5184                                                                             | 5472                                                                              |
| $\theta$ range, deg                                             | 2.27 to 28.70                                                                    | 2.43 to 27.10                                                                     |
| Index ranges                                                    | -21 ≤ <i>h</i> ≤ 21                                                              | -23 ≤ <i>h</i> ≤ 24                                                               |
|                                                                 | -21 ≤ <i>k</i> ≤ 21                                                              | -25 ≤ <i>k</i> ≤ 25                                                               |
|                                                                 | -51 ≤ <i>l</i> ≤ 51                                                              | -59 ≤ <i>l</i> ≤ 59                                                               |
| No. of reflns collected                                         | 86690                                                                            | 96558                                                                             |
| Completeness to $\theta_{\text{max}}$                           | 99.9%                                                                            | 99.9%                                                                             |
| No. indep. Reflns                                               | 12851                                                                            | 19286                                                                             |
| No. obsd reflns with ( <i>I</i> > 2σ( <i>I</i> ))               | 10879                                                                            | 15448                                                                             |
| No. refined params                                              | 739                                                                              | 739                                                                               |
| GooF ( <i>F</i> <sup>2</sup> )                                  | 1.142                                                                            | 1.046                                                                             |
| <i>R</i> <sub>1</sub> ( <i>F</i> ) ( <i>I</i> > 2σ( <i>I</i> )) | 0.0489                                                                           | 0.0377                                                                            |
| <i>wR</i> <sub>2</sub> ( <i>F</i> <sup>2</sup> ) (all data)     | 0.1128                                                                           | 0.0872                                                                            |
| Largest diff peak/hole, e Å <sup>-3</sup>                       | 1.232 / -0.584                                                                   | 0.568 / -0.507                                                                    |
| CCDC number                                                     | 2423663                                                                          | 2423664                                                                           |

**Table S3.** Crystal data and structure refinement of compounds **2** • toluene and **3** • CH<sub>2</sub>Cl<sub>2</sub>.

|                                                                          | <b>2</b> • toluene                                                                | <b>3</b> • CH <sub>2</sub> Cl <sub>2</sub>                                                        |
|--------------------------------------------------------------------------|-----------------------------------------------------------------------------------|---------------------------------------------------------------------------------------------------|
| Formula                                                                  | C <sub>63</sub> H <sub>36</sub> BF <sub>20</sub> Fe <sub>2</sub> PSe <sub>2</sub> | C <sub>57</sub> H <sub>30</sub> BCl <sub>2</sub> F <sub>20</sub> Fe <sub>2</sub> PTe <sub>2</sub> |
| Formula weight, g mol <sup>-1</sup>                                      | 1484.32                                                                           | 1574.39                                                                                           |
| Crystal system                                                           | triclinic                                                                         | triclinic                                                                                         |
| Crystal size, mm                                                         | 0.21 × 0.20 × 0.18                                                                | 0.50 × 0.19 × 0.16                                                                                |
| Space group                                                              | <i>P</i> $\bar{1}$                                                                | <i>P</i> $\bar{1}$                                                                                |
| <i>a</i> , Å                                                             | 10.8629(8)                                                                        | 10.3907(6)                                                                                        |
| <i>b</i> , Å                                                             | 15.1456(11)                                                                       | 15.4524(8)                                                                                        |
| <i>c</i> , Å                                                             | 17.3801(10)                                                                       | 18.1339(9)                                                                                        |
| $\alpha$ , °                                                             | 71.852(2)                                                                         | 104.965(2)                                                                                        |
| $\beta$ , °                                                              | 75.728(2)                                                                         | 103.652(2)                                                                                        |
| $\gamma$ , °                                                             | 87.113(3)                                                                         | 92.341(2)                                                                                         |
| <i>V</i> , Å <sup>3</sup>                                                | 2632.3(3)                                                                         | 2717.3(3)                                                                                         |
| <i>Z</i>                                                                 | 2                                                                                 | 2                                                                                                 |
| $\rho_{\text{calcd}}$ , Mg m <sup>-3</sup>                               | 2.081                                                                             | 1.924                                                                                             |
| $\mu$ (Mo <i>K</i> $\alpha$ ), mm <sup>-1</sup>                          | 1.873                                                                             | 1.824                                                                                             |
| <i>F</i> (000)                                                           | 1468                                                                              | 1524                                                                                              |
| $\theta$ range, deg                                                      | 2.37 to 27.50                                                                     | 2.03 to 27.50                                                                                     |
| Index ranges                                                             | -14 ≤ <i>h</i> ≤ 13<br>-19 ≤ <i>k</i> ≤ 19<br>-22 ≤ <i>l</i> ≤ 22                 | -13 ≤ <i>h</i> ≤ 13<br>-20 ≤ <i>k</i> ≤ 20<br>-23 ≤ <i>l</i> ≤ 22                                 |
| No. of reflns collected                                                  | 60562                                                                             | 122020                                                                                            |
| Completeness to $\theta_{\text{max}}$                                    | 99.9%                                                                             | 99.9%                                                                                             |
| No. indep. Reflns                                                        | 12070                                                                             | 12481                                                                                             |
| No. obsd reflns with ( <i>I</i> > 2 $\sigma$ ( <i>I</i> ))               | 9204                                                                              | 12032                                                                                             |
| No. refined params                                                       | 739                                                                               | 739                                                                                               |
| Goof ( <i>F</i> <sup>2</sup> )                                           | 1.057                                                                             | 1.099                                                                                             |
| <i>R</i> <sub>1</sub> ( <i>F</i> ) ( <i>I</i> > 2 $\sigma$ ( <i>I</i> )) | 0.0441                                                                            | 0.0224                                                                                            |
| <i>wR</i> <sub>2</sub> ( <i>F</i> <sup>2</sup> ) (all data)              | 0.1269                                                                            | 0.0568                                                                                            |
| Largest diff peak/hole, e Å <sup>-3</sup>                                | 0.748 / -0.585                                                                    | 0.912 / -0.956                                                                                    |
| CCDC number                                                              | 2423665                                                                           | 2423666                                                                                           |

**Table S4.** Crystal data and structure refinement of compounds **4** and **5** · CH<sub>2</sub>Cl<sub>2</sub>.

|                                                                          | <b>4</b>                                                                          | <b>5</b> · CH <sub>2</sub> Cl <sub>2</sub>                                                        |
|--------------------------------------------------------------------------|-----------------------------------------------------------------------------------|---------------------------------------------------------------------------------------------------|
| Formula                                                                  | C <sub>64</sub> H <sub>36</sub> BF <sub>20</sub> Fe <sub>4</sub> PSe <sub>2</sub> | C <sub>57</sub> H <sub>28</sub> BCl <sub>2</sub> F <sub>20</sub> Fe <sub>2</sub> PSe <sub>2</sub> |
| Formula weight, g mol <sup>-1</sup>                                      | 1608.03                                                                           | 1475.09                                                                                           |
| Crystal system                                                           | triclinic                                                                         | monoclinic                                                                                        |
| Crystal size, mm                                                         | 0.38 × 0.26 × 0.26                                                                | 0.22 × 0.16 × 0.07                                                                                |
| Space group                                                              | <i>P</i> $\bar{1}$                                                                | <i>P</i> 2 <sub>1</sub> / <i>n</i>                                                                |
| <i>a</i> , Å                                                             | 13.4185(6)                                                                        | 16.326(4)                                                                                         |
| <i>b</i> , Å                                                             | 13.8756(6)                                                                        | 9.990(2)                                                                                          |
| <i>c</i> , Å                                                             | 15.8321(7)                                                                        | 32.781(7)                                                                                         |
| $\alpha$ , °                                                             | 100.509(2)                                                                        | 90                                                                                                |
| $\beta$ , °                                                              | 95.382(2)                                                                         | 98.502(9)                                                                                         |
| $\gamma$ , °                                                             | 92.036(2)                                                                         | 90                                                                                                |
| <i>V</i> , Å <sup>3</sup>                                                | 2881.4(2)                                                                         | 5288.1(19)                                                                                        |
| <i>Z</i>                                                                 | 2                                                                                 | 4                                                                                                 |
| $\rho_{\text{calcd}}$ , Mg m <sup>-3</sup>                               | 1.853                                                                             | 1.853                                                                                             |
| $\mu$ (Mo <i>K</i> $\alpha$ ), mm <sup>-1</sup>                          | 2.387                                                                             | 2.169                                                                                             |
| <i>F</i> (000)                                                           | 1584                                                                              | 2896                                                                                              |
| $\theta$ range, deg                                                      | 2.39 to 30.52                                                                     | 2.40 to 28.32                                                                                     |
| Index ranges                                                             | -19 ≤ <i>h</i> ≤ 19                                                               | -21 ≤ <i>h</i> ≤ 21                                                                               |
|                                                                          | -19 ≤ <i>k</i> ≤ 19                                                               | -13 ≤ <i>k</i> ≤ 13                                                                               |
|                                                                          | -22 ≤ <i>l</i> ≤ 22                                                               | -43 ≤ <i>l</i> ≤ 43                                                                               |
| No. of reflns collected                                                  | 177357                                                                            | 98939                                                                                             |
| Completeness to $\theta_{\text{max}}$                                    | 99.9%                                                                             | 99.8%                                                                                             |
| No. indep. Reflns                                                        | 17580                                                                             | 13162                                                                                             |
| No. obsd reflns with ( <i>I</i> > 2 $\sigma$ ( <i>I</i> ))               | 15978                                                                             | 10777                                                                                             |
| No. refined params                                                       | 847                                                                               | 739                                                                                               |
| Goof ( <i>F</i> <sup>2</sup> )                                           | 1.063                                                                             | 1.039                                                                                             |
| <i>R</i> <sub>1</sub> ( <i>F</i> ) ( <i>I</i> > 2 $\sigma$ ( <i>I</i> )) | 0.0299                                                                            | 0.0446                                                                                            |
| <i>wR</i> <sub>2</sub> ( <i>F</i> <sup>2</sup> ) (all data)              | 0.0766                                                                            | 0.1266                                                                                            |
| Largest diff peak/hole, e Å <sup>-3</sup>                                | 1.083 / -1.069                                                                    | 0.982 / -0.797                                                                                    |

## 5 Computational Details

Geometry Optimizations were carried out using density functional theory (DFT) using the B3PW91/6-311+G(2df,p)<sup>S10,11</sup> level of theory using the Gaussian16<sup>S12</sup> software package. For Se and Te effective core potentials accounting for 10 (Se) and 28 (Te) electrons and corresponding cc-pVTZ basis sets<sup>S13</sup> were used. Dispersion effects were modelled using Grimme's GD3BJ parameters.<sup>S14</sup> Electrostatic potentials were plotted with VMD.<sup>S15</sup>

## 6 References

- [S1] C. Stoian, M. Olaru, S. Demeshko, M. Fischer, S. Mebs, E. Hupf, J. Beckmann, *Chem. Eur. J.* **2025**, *31*, e202403555.
- [S2] M. Herberhold, P. Leitner, *J. Organomet. Chem.* **1987**, *336*, 153–161.
- [S3] T. M. Klapötke, B. Krumm, M. Scherr, *Z. Anorg. Allg. Chem.* **2010**, *636*, 1955–1961.
- [S4] G. R. Fulmer, A. J. M. Miller, N. H. Sherden, H. E. Gottlieb, A. Nudelman, B. M. Stoltz, J. E. Bercaw, K. I. Goldberg, *Organometallics* **2010**, *29*, 2176–2179.
- [S5] F. Menges, “Spectragryph – optical spectroscopy software”, Version 1.2.12, **2022**, <http://www.ffmpeg2.de/spectragryph/> (accessed 03.12.2024).
- [S6] L. J. Farrugia WinGX suite for small-molecule single-crystal crystallography. *J. Appl. Crystallogr.* **1999**, *32*, 837–838.
- [S7] G. M. Sheldrick, *Acta Cryst.* **2015**, *C71*, 3–8.
- [S8] O. V. Dolomanov, L. J. Bourhis, R. J., Gildea, R. J., J. A. K. Howard, H. Puschmann, *J. Appl. Crystallogr.* **2009**, *42*, 339–341.
- [S9] Crystal Impact - Dr. H. Putz & Dr. K. Brandenburg GbR. *Diamond - Crystal and Molecular Structure Visualization*, 2014.
- [S10] (a) A. D. Becke, *J. Chem. Phys.* **1993**, *98*, 5648–5652; (b) J. P. Perdew, J. A. Chevary, S. H. Vosko, K. A. Jackson, M. R. Pederson, D. J. Singh and C. Fiolhais, *Phys. Rev. B: Condens. Matter Mater. Phys.* **1992**, *46*, 6671–6687.
- [S11] (a) R. Krishnan, J. S. Binkley, R. Seeger and J. A. Pople, *J. Chem. Phys.* **1980**, *72*, 650–654; (b) A. D. McLean and G. S. Chandler, *J. Chem. Phys.* **1980**, *72*, 5639–5648.
- [S12] Gaussian16 (RevisionC.01), M. J. Frisch, G. W. Trucks, H. B. Schlegel, G. E. Scuseria, M. A. Robb, J. R. Cheeseman, G. Scalmani, V. Barone, G. A. Petersson, H. Nakatsuji, X. Li, M. Caricato, A. V. Marenich, J. Bloino, B. G. Janesko, R. Gomperts, B. Mennucci, H. P. Hratchian, J. V. Ortiz, A. F. Izmaylov, J. L. Sonnenberg, D. Williams-Young, F. Ding, F.

Lipparini, F. Egidi, J. Goings, B. Peng, A. Petrone, T. Henderson, D. Ranasinghe, V. G. Zakrzewski, J. Gao, N. Rega, G. Zheng, W. Liang, M. Hada, M. Ehara, K. Toyota, R. Fukuda, J. Hasegawa, M. Ishida, T. Nakajima, Y. Honda, O. Kitao, H. Nakai, T. Vreven, K. Throssell, J. A. Montgomery, Jr., J. E. Peralta, F. Ogliaro, M. J. Bearpark, J. J. Heyd, E. N. Brothers, K. N. Kudin, V. N. Staroverov, T. A. Keith, R. Kobayashi, J. Normand, K. Raghavachari, A. P. Rendell, J. C. Burant, S. S. Iyengar, J. Tomasi, M. Cossi, J. M. Millam, M. Klene, C. Adamo, R. Cammi, J. W. Ochterski, R. L. Martin, K. Morokuma, O. Farkas, J. B. Foresman and D. J. Fox, Gaussian, Inc., Wallingford CT, 2019.

[S13] (a) B. Metz, H. Stoll and M. Dolg, *J. Chem. Phys.* **2000**, *113*, 2563-2569; (b) K. A. Peterson, *J. Chem. Phys.* **2003**, *119*, 11099–11112. (c) K. A. Peterson, D. Figgen, E. Goll, H. Stoll and M. Dolg, *J. Chem. Phys.* **2003**, *119*, 11113–11123.

[S14] S. Grimme, S. Ehrlich and L. Goerigk, *J. Comp. Chem.* **2011**, *32*, 1456–1465.

[S15] W. Humphrey, A. Dalke and K. Schulten, *J. Mol. Graph.* **1996**, *14*, 33–38.
